# Supplementary material for: Lipase-catalyzed regioselective domino reaction for the synthesis of chromenone derivatives
Source: Royal Society of Chemistry journal article supplement (doi:10.1039/c5ra13267c), 2015-01-01

## Electronic Supplementary Information (ESI)

### Lipase-catalyzed regioselective domino reaction for the synthesis of chromenone derivatives

Qi Yang, Long-Hua Zhou, Wan-Xia Wu, Wei Zhang, Na Wang\* and Xiao-Qi Yu\*

*Key Laboratory of Green Chemistry & Technology, Ministry of Education, College of Chemistry, Sichuan University, Chengdu 610064, P. R. China.*

*\*Corresponding authors: wnchem@scu.edu.cn (N. Wang), xqyu@scu.edu.cn (X.-Q. Yu).*

### Table of Contents

#### Experimental Section

*Materials and methods*

*General procedure for the synthesis of 7,8-dihydro-2H-chromen-5(6H)-ones*

*General procedure for the synthesis of 3,4,7,8-tetrahydro-2H-chromen-5(6H)-ones*

#### Supplementary Information about Optimization of Reaction Conditions

*Table S1 The effect of molar ratio on the BPL-catalyzed domino reaction*

*Table S2 The effect of molar ratio on the PFL-catalyzed domino reaction*

*Figure S1 Complementary HPLC traces for Table 1 entries 2 and 3*

*Figure S2 Complementary HPLC traces for Fig. 3*

*Figure S3 The effect of temperature on the BPL- and PFL-catalyzed domino reaction*

**<sup>1</sup>H-NMR, <sup>13</sup>C-NMR and HRMS data of chromenone derivatives**

**<sup>1</sup>H-NMR, <sup>13</sup>C-NMR and HRMS spectra of chromenone derivatives**

## Experimental Section

### *Materials and methods*

Trypsin (Bovine pancreas,  $\geq 2500$  u/mg), Lipase from *Candida antarctica* B (CAL-B, 2 U/mg), Lipase from *Mucor miehei* (MML, 102.5 u/g), Lipase from Bovine pancreas (BPL, 15-35 u/g), Amano Lipase from *Mucor jaranicus* (MJL, 10 U/mg), Lipase from *Pseudomonas fluorescens* (PFL,  $\geq 600$  u/g), Lipase from *Candida rugosa* (CRL, 739 u/mg) were purchased from Sigma-Aldrich. Bovine Serum Albumin (BSA), Lipase from *Candida cylindracea* (CCL, 7.29 u/mg) was purchased from Aladdin Co., Ltd. (Shanghai, China). Unless otherwise mentioned, all reagents were obtained from commercial suppliers and used without further purification. The NMR spectra were recorded on a Bruker 400 MHz instrument using  $\text{CDCl}_3$  as solvents. Chemical shifts ( $\delta$ ) were expressed in ppm with TMS as internal standard, and coupling constants ( $J$ ) were reported in Hz. HPLC was carried out on Waters instrument (Waters 2695, 2998) using a C18 column (250 mm  $\times$  4.6 mm) from Dikma Technologies. Elution was performed with a mixture of  $\text{CH}_3\text{OH}/\text{H}_2\text{O}$  (10/90-70/30, v/v) by gradient elution method at 0.8 mL/min at 30 °C. HRMS were performed on Bruker Daltonics Bio TOF mass spectrometer. Column chromatography was carried on silica gel (200-300 mesh) using ethyl acetate-petroleum ether as mobile phase.

### *General procedure for the synthesis of 7,8-dihydro-2H-chromen-5(6H)-ones*

1,3-dione (2 mmol),  $\alpha,\beta$ -unsaturated aldehyde (10 mmol), BPL (100 mg), acetonitrile (5 mL) were added to a round-bottom flask, and shaken at 200 rpm at 30 °C. Reactions were monitored by thin-layer chromatography and visualized by UV light. After completion of the reaction, the solid residue was filtered off and the solvent was evaporated. In the end, the products were obtained by flash chromatography with petroleum ether/ethyl acetate (2:1).

### *General procedure for the synthesis of 3,4,7,8-tetrahydro-2H-chromen-5(6H)-ones*

1,3-dione (2 mmol),  $\alpha,\beta$ -unsaturated aldehyde (10 mmol), PFL (100 mg), dichloromethane (4.75 mL) and deionized water (0.25 mL) were added to a round-bottom flask, and shaken at 200 rpm at 30 °C. After finishing the reaction, the products were purified by flash chromatography with petroleum ether/ethyl acetate (5:1).

## Supplementary Information about optimization of reaction conditions

**Table S1 The effect of molar ratio on the BPL-catalyzed domino reaction<sup>a</sup>**

| entry | Molar ratio (1a : 2a) | Yield of 3a <sup>b</sup> [%] | Yield of 4a <sup>c</sup> [%] |
|-------|-----------------------|------------------------------|------------------------------|
| 1     | 1:1                   | 21                           | trace                        |
| 2     | 1:2                   | 40                           | trace                        |
| 3     | 1:5                   | 91                           | trace                        |
| 4     | 1:10                  | 73                           | trace                        |
| 5     | 1:20                  | 46                           | trace                        |
| 6     | 1:40                  | 10                           | trace                        |
| 7     | 2:1                   | 26                           | trace                        |
| 8     | 5:1                   | 26                           | trace                        |
| 9     | 10:1                  | 26                           | trace                        |
| 10    | 20:1                  | 35                           | 51                           |

<sup>a</sup> Reaction conditions: **1a**, **2a**, BPL (10 mg), acetonitrile (1 mL) were added to a 10 mL erlenmeyer flask, and shaken at 200 rpm at 30 °C for 24 h.

<sup>b</sup> Determined by HPLC.

<sup>c</sup> Determined by HPLC.

**Table S2 The effect of molar ratio on the PFL-catalyzed domino reaction<sup>a</sup>**

| entry | Molar ratio (1a: 2a) | Yield of 3a <sup>b</sup> [%] | Yield of 4a <sup>c</sup> [%] |
|-------|----------------------|------------------------------|------------------------------|
| 1     | 1:1                  | 9                            | 44                           |
| 2     | 1:2                  | 9                            | 60                           |
| 3     | 1:5                  | 10                           | 63                           |
| 4     | 1:10                 | 10                           | 62                           |
| 5     | 1:20                 | 11                           | 60                           |
| 6     | 1:40                 | 11                           | 58                           |
| 7     | 2:1                  | 16                           | 37                           |
| 8     | 5:1                  | 40                           | 21                           |
| 9     | 10:1                 | 78                           | 21                           |
| 10    | 20:1                 | 91                           | 10                           |

<sup>a</sup>Reaction conditions: **1a**, **2a**, PFL (10 mg), dichloromethane (950  $\mu$ L), and H<sub>2</sub>O (50  $\mu$ L) were added to a 10 mL erlenmeyer flask, and shaken at 200 rpm at 30 °C for 24 h.

<sup>b</sup> Determined by HPLC.

<sup>c</sup> Determined by HPLC.

### Figure S1 Complementary HPLC traces for Table 1 entries 2 and 3

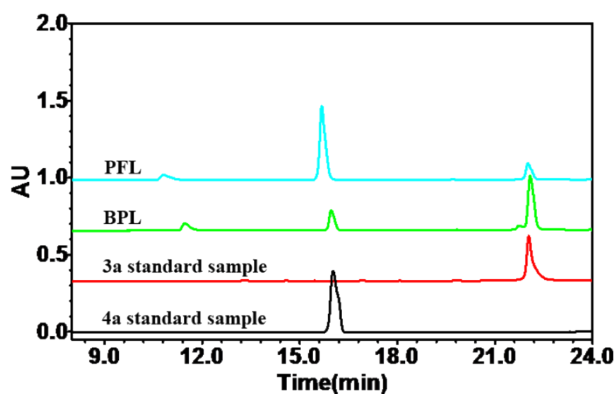

**Figure S1** *Blue*: the crude HPLC traces of PFL-catalyzed domino reaction, reaction conditions: **1a** (0.1 mmol), **2a** (0.5 mmol), PFL (10 mg), DMSO (1 mL), 200 rpm, 30°C, 24 h; *green*: the crude HPLC trace of BPL-catalyzed domino reaction, reaction conditions: **1a** (0.1 mmol), **2a** (0.5 mmol), BPL (10 mg), DMSO (1 mL), 200 rpm, 30 °C, 24 h.

**Figure S2** Complementary HPLC traces for Fig. 3

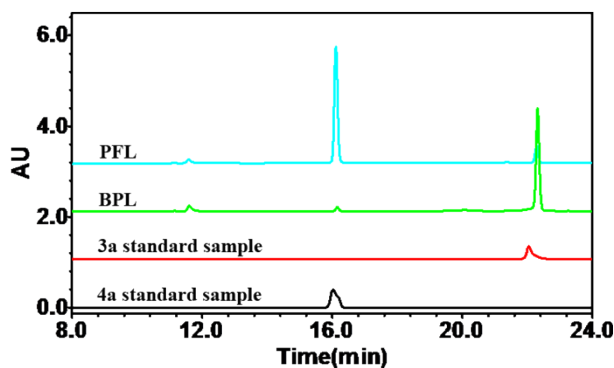

**Figure S2** *Blue*: the crude HPLC traces of PFL-catalyzed domino reaction, reaction conditions: **1a** (0.1 mmol), **2a** (0.5 mmol), PFL (20 mg), dichloromethane (950  $\mu$ L), H<sub>2</sub>O (50  $\mu$ L), 200 rpm, 30°C, 24 h; *green*: the crude HPLC trace of BPL-catalyzed domino reaction, reaction conditions: **1a** (0.1 mmol), **2a** (0.5 mmol), BPL (20 mg), CH<sub>3</sub>CN (1 mL), 200 rpm, 30 °C, 24 h.

**Figure S3** The effect of temperature on the BPL- and PFL-catalyzed domino reaction

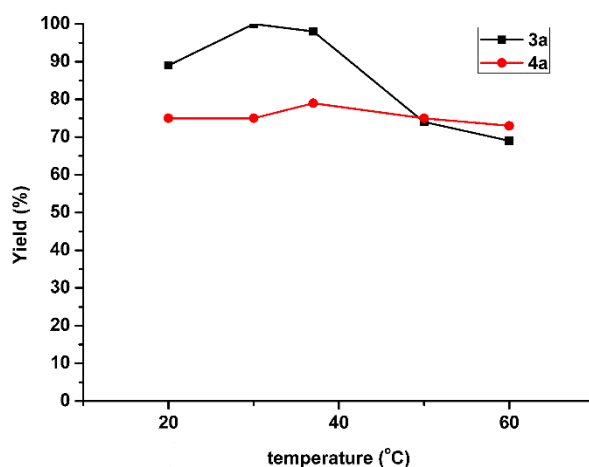

**Figure S3** The effect of temperature on the BPL-catalyzed domino reaction (in black)<sup>a</sup> and PFL-catalyzed (in red)<sup>b</sup> domino reaction. Reaction conditions: (a) **1a** (0.1 mmol), **2a** (0.5 mmol), BPL (20 mg), acetonitrile (1 mL),

200 rpm, 24 h; (b) **1a** (0.1 mmol), **2a** (0.5 mmol), PFL (20 mg), dichloromethane (950  $\mu$ L), and H<sub>2</sub>O (50  $\mu$ L), 200 rpm, 24 h. All yields were determined by HPLC.

### **<sup>1</sup>H-NMR, <sup>13</sup>C-NMR and HRMS data of chromenone derivatives**

#### **2-methyl-7,8-dihydro-2H-chromen-5(6H)-one (3a)**

Yellow oil; <sup>1</sup>H NMR (400 MHz, CDCl<sub>3</sub>):  $\delta$  6.51–6.36(m, 1H), 5.27 (dd,  $J$  = 10.0, 3.1 Hz, 1H), 5.00 (qdd,  $J$  = 6.5, 3.1, 1.7 Hz, 1H), 2.38 (ddd,  $J$  = 9.1, 7.4, 4.3 Hz, 4H), 1.98 – 1.93 (m, 2H), 1.40 (d,  $J$  = 6.6 Hz, 3H). <sup>13</sup>C NMR (100 MHz, CDCl<sub>3</sub>)  $\delta$  194.87, 172.29, 118.86, 117.30, 111.33, 77.41, 77.09, 76.77, 73.92, 36.42, 28.32, 21.67, 20.62. HRMS (ESI, m/z): [M+H]<sup>+</sup> calcd. for C<sub>10</sub>H<sub>12</sub>O<sub>2</sub>, 165.0915; found 165.0915.

#### **2-ethyl-7,8-dihydro-2H-chromen-5(6H)-one (3b)**

Yellow oil; <sup>1</sup>H NMR (400 MHz, CDCl<sub>3</sub>)  $\delta$  6.44 (dd,  $J$  = 10.1, 1.7 Hz, 1H), 5.35 – 5.19 (m, 1H), 4.83 (dtd,  $J$  = 7.6, 3.1, 1.6 Hz, 1H), 2.45 – 2.30 (m, 4H), 2.01 – 1.89 (m, 2H), 1.79 – 1.65 (m, 2H), 1.00 – 0.90 (m, 3H). <sup>13</sup>C NMR (100 MHz, CDCl<sub>3</sub>)  $\delta$  194.99, 172.82, 117.71, 117.50, 111.33, 78.77, 77.43, 77.11, 76.79, 36.34, 28.78, 28.24, 20.58, 8.55. HRMS (ESI, m/z): [M-H]<sup>+</sup> calcd. for C<sub>11</sub>H<sub>14</sub>O<sub>2</sub>, 177.0916; found 177.0911.

#### **2-propyl-7,8-dihydro-2H-chromen-5(6H)-one (3c)**

Yellow oil, <sup>1</sup>H NMR (400 MHz, CDCl<sub>3</sub>)  $\delta$  6.47 – 6.35 (m, 1H), 5.25 (dd,  $J$  = 10.0, 3.2 Hz, 1H), 4.92 – 4.81 (m, 1H), 2.42 – 2.29 (m, 4H), 1.97 – 1.88 (m, 2H), 1.76 – 1.65 (m, 1H), 1.64 – 1.54 (m, 1H), 1.42 (dddt,  $J$  = 17.3, 13.3, 10.0, 7.4 Hz, 2H), 0.91 (t,  $J$  = 7.4 Hz, 3H). <sup>13</sup>C NMR (100 MHz, CDCl<sub>3</sub>)  $\delta$  194.71, 172.45, 117.81, 117.52, 111.37, 77.44, 77.42, 77.13, 76.81, 37.83, 36.37, 28.24, 20.59, 17.53, 13.84. HRMS (ESI, m/z): [M+H]<sup>+</sup> calcd. for C<sub>12</sub>H<sub>16</sub>O<sub>2</sub>, 193.1228; found 193.1225.

#### **2,2-dimethyl-7,8-dihydro-2H-chromen-5(6H)-one (3d)**

Yellow oil; <sup>1</sup>H NMR (400 MHz, CDCl<sub>3</sub>)  $\delta$  6.35 (d,  $J$  = 10.0 Hz, 1H), 5.19 (d,  $J$  = 10.0 Hz, 1H), 2.34 (dt,  $J$  = 9.1, 6.7 Hz, 4H), 1.93 (dd,  $J$  = 13.0, 6.5 Hz, 2H), 1.35 (s, 6H). <sup>13</sup>C NMR (100 MHz, CDCl<sub>3</sub>)  $\delta$  194.78, 171.56, 122.82, 115.75, 110.47, 79.66, 77.49, 77.17, 76.85, 36.36, 28.58, 28.35, 20.60. HRMS (ESI, m/z): [M+H]<sup>+</sup> calcd. for C<sub>11</sub>H<sub>14</sub>O<sub>2</sub>, 179.1073; found 179.1072.

#### **2,7,7-trimethyl-7,8-dihydro-2H-chromen-5(6H)-one (3e)**

Yellow oil; <sup>1</sup>H NMR (400 MHz, CDCl<sub>3</sub>)  $\delta$  6.40 (d,  $J$  = 9.9 Hz, 1H), 5.36 – 5.18 (m, 1H), 4.97 (ddd,  $J$  = 6.5, 3.2, 1.6 Hz, 1H), 2.30 – 2.18 (m, 4H), 1.43 – 1.34 (m, 3H), 1.06 – 1.01 (m, 6H). <sup>13</sup>C NMR (100 MHz, CDCl<sub>3</sub>)  $\delta$  194.55, 170.81, 118.61, 117.13, 110.22, 73.94, 50.34, 42.07, 32.20, 28.43, 28.34, 21.62. HRMS (ESI, m/z): [M+H]<sup>+</sup> calcd. for C<sub>12</sub>H<sub>16</sub>O<sub>2</sub>, 193.1228; found 193.1229.

#### **2-ethyl-7,7-dimethyl-7,8-dihydro-2H-chromen-5(6H)-one (3f)**

Yellow oil; <sup>1</sup>H NMR (400 MHz, CDCl<sub>3</sub>) δ 6.43 (dd, *J* = 10.0, 1.4 Hz, 1H), 5.25 (dd, *J* = 10.0, 3.2 Hz, 1H), 4.95 – 4.78 (m, 1H), 2.30 – 2.20 (m, 4H), 1.69 (ddd, *J* = 13.0, 7.4, 4.6 Hz, 2H), 1.03 (d, *J* = 3.8 Hz, 6H), 0.95 (t, *J* = 7.4 Hz, 3H). <sup>13</sup>C NMR (100 MHz, CDCl<sub>3</sub>) δ 194.51, 171.18, 117.55, 117.24, 110.18, 78.80, 77.42, 77.10, 76.78, 50.31, 42.03, 32.14, 28.77, 28.40, 28.35, 8.52. HRMS (ESI, *m/z*): [M+H]<sup>+</sup> calcd. for C<sub>13</sub>H<sub>18</sub>O<sub>2</sub>, 207.1385; found 207.1382.

#### 7,7-dimethyl-2-propyl-7,8-dihydro-2*H*-chromen-5(6*H*)-one (**3g**)

Yellow oil; <sup>1</sup>H NMR (400 MHz, CDCl<sub>3</sub>) δ 6.42 (dd, *J* = 10.0, 1.2 Hz, 1H), 5.26 (dd, *J* = 10.0, 3.2 Hz, 1H), 4.99 – 4.79 (m, 1H), 2.28 – 2.20 (m, 4H), 1.76 – 1.67 (m, 1H), 1.64 – 1.56 (m, 1H), 1.49 – 1.35 (m, 2H), 1.03 (d, *J* = 2.2 Hz, 6H), 0.92 (t, *J* = 7.3 Hz, 3H). <sup>13</sup>C NMR (100 MHz, CDCl<sub>3</sub>) δ 194.70, 170.90, 118.65, 117.18, 110.29, 74.01, 50.37, 42.12, 32.25, 30.10, 28.47, 28.38, 21.66. HRMS (ESI, *m/z*): [M+H]<sup>+</sup> calcd. for C<sub>14</sub>H<sub>20</sub>O<sub>2</sub>, 221.1541; found 221.1515.

#### 2,2,7,7-tetramethyl-7,8-dihydro-2*H*-chromen-5(6*H*)-one (**3h**)

Yellow oil; <sup>1</sup>H NMR (400 MHz, CDCl<sub>3</sub>) δ 6.39 (d, *J* = 9.9 Hz, 1H), 5.22 (d, *J* = 9.9 Hz, 1H), 2.24 (s, 4H), 1.38 (s, 6H), 1.06 (s, 6H). <sup>13</sup>C NMR (100 MHz, CDCl<sub>3</sub>) δ 194.50, 170.10, 122.68, 115.75, 109.54, 79.76, 50.41, 42.44, 32.24, 28.43, 28.34. HRMS (ESI, *m/z*): [M+H]<sup>+</sup> calcd. for C<sub>13</sub>H<sub>18</sub>O<sub>2</sub>, 207.1385; found 207.1384.

#### 2-hydroxy-4-methyl-3,4,7,8-tetrahydro-2*H*-chromen-5(6*H*)-one (**4a**)

White solid; <sup>1</sup>H NMR (400 MHz, DMSO) δ 7.34 (dd, *J* = 37.4, 6.3 Hz, 1H), 5.36 – 5.24 (m, 1H), 2.71 – 2.54 (m, 1H), 2.41 – 2.13 (m, 4H), 1.95 – 1.49 (m, 4H), 1.07 (dd, *J* = 40.6, 6.9 Hz, 3H). <sup>13</sup>C NMR (100 MHz, DMSO) δ 196.78, 169.55, 115.28, 93.17, 40.37, 40.16, 39.95, 39.74, 39.53, 37.13, 35.90, 28.58, 23.40, 21.23, 21.07. HRMS (ESI, *m/z*): [M+H]<sup>+</sup> calcd. for C<sub>10</sub>H<sub>14</sub>O<sub>3</sub>, 183.1021; found 183.1025.

#### 4-ethyl-2-hydroxy-3,4,7,8-tetrahydro-2*H*-chromen-5(6*H*)-one (**4b**)

Yellow oil; <sup>1</sup>H NMR (400 MHz, CDCl<sub>3</sub>) δ 5.59 (s, 1H), 5.39 (dd, *J* = 9.6, 2.2 Hz, 1H), 2.66 – 2.54 (m, 1H), 2.37 (dt, *J* = 14.2, 6.4 Hz, 4H), 2.08 (dd, *J* = 17.6, 6.2 Hz, 1H), 1.97 – 1.90 (m, 2H), 1.79 – 1.35 (m, 2H), 1.13 (ddd, *J* = 13.8, 10.0, 7.1 Hz, 1H), 0.91 (t, *J* = 7.4 Hz, 3H). <sup>13</sup>C NMR (100 MHz, CDCl<sub>3</sub>) δ 198.84, 170.60, 115.19, 93.36, 36.90, 31.19, 29.72, 28.79, 26.94, 20.86, 11.61. HRMS (ESI, *m/z*): [M+H]<sup>+</sup> calcd. for C<sub>11</sub>H<sub>16</sub>O<sub>3</sub>, 197.1177; found 197.1176.

#### 2-hydroxy-4-propyl-3,4,7,8-tetrahydro-2*H*-chromen-5(6*H*)-one (**4c**)

Yellow oil; <sup>1</sup>H NMR (400 MHz, CDCl<sub>3</sub>) δ 6.30 – 5.68 (m, 1H), 5.38 (d, *J* = 9.3 Hz, 1H), 2.67 (d, *J* = 4.0 Hz, 1H), 2.46 – 2.23 (m, 4H), 2.02 (dd, *J* = 7.5, 6.1 Hz, 1H), 1.96 – 1.82 (m, 2H), 1.60 (d, *J* = 14.2 Hz, 2H), 1.38 (s, 1H), 1.23 (d, *J* = 7.2 Hz, 1H), 1.09 (s, 1H), 0.86 (t, *J* = 7.2 Hz, 3H). <sup>13</sup>C NMR (101 MHz, CDCl<sub>3</sub>) δ 198.78, 170.60,

115.29, 93.40, 36.87, 36.55, 31.77, 28.93, 28.78, 27.96, 27.83, 20.85, 20.24, 19.86, 14.10, 14.02. HRMS (ESI, m/z): [M-H]<sup>+</sup> calcd. for C<sub>12</sub>H<sub>18</sub>O<sub>3</sub>, 209.1177; found 209.1179.

**2-hydroxy-4,7,7-trimethyl-3,4,7,8-tetrahydro-2H-chromen-5(6H)-one (4d)**

Yellow oil; <sup>1</sup>H NMR (400 MHz, CDCl<sub>3</sub>) δ 5.42 (d, *J* = 9.6 Hz, 2H), 2.29 – 2.18 (m, 4H), 1.87 (dd, *J* = 9.1, 6.7 Hz, 1H), 1.82 – 1.70 (m, 1H), 1.26 – 1.21 (m, 1H), 1.10 (d, *J* = 7.0 Hz, 3H), 1.03 (d, *J* = 12.2 Hz, 6H). <sup>13</sup>C NMR (100 MHz, CDCl<sub>3</sub>) δ 198.34, 168.34, 114.62, 93.26, 50.80, 42.37, 35.57, 32.14, 28.83, 27.69, 23.04, 20.98. HRMS (ESI, m/z): [M+H]<sup>+</sup> calcd. for C<sub>12</sub>H<sub>18</sub>O<sub>3</sub>, 211.1334; found 211.1336.

**4-ethyl-2-hydroxy-7,7-dimethyl-3,4,7,8-tetrahydro-2H-chromen-5(6H)-one (4e)**

Yellow oil; <sup>1</sup>H NMR (400 MHz, CDCl<sub>3</sub>) δ 6.46 (s, 1H), 5.34 (dd, *J* = 7.2, 2.3 Hz, 1H), 2.54 (s, 1H), 2.24 – 2.07 (m, 4H), 2.06 – 1.95 (m, 1H), 1.86 – 1.52 (m, 2H), 1.23 – 1.03 (m, 1H), 1.00 – 0.91 (m, 6H), 0.88 – 0.78 (m, 3H). <sup>13</sup>C NMR (100 MHz, CDCl<sub>3</sub>) δ 198.67, 169.12, 113.80, 93.44, 50.66, 42.43, 32.09, 31.18, 29.55, 28.58, 27.84, 26.98, 11.62. HRMS (ESI, m/z): [M+H]<sup>+</sup> calcd. for C<sub>13</sub>H<sub>20</sub>O<sub>3</sub>, 225.1490; found 225.1488.

**2-hydroxy-7,7-dimethyl-4-propyl-3,4,7,8-tetrahydro-2H-chromen-5(6H)-one (4f)**

Yellow oil; <sup>1</sup>H NMR (400 MHz, CDCl<sub>3</sub>) δ 5.39 (dd, *J* = 9.7, 2.0 Hz, 1H), 2.67 (dd, *J* = 21.6, 16.6 Hz, 1H), 2.33 – 2.13 (m, 4H), 2.11 – 1.99 (m, 1H), 1.99 – 1.55 (m, 2H), 1.55 – 1.06 (m, 4H), 1.02 (d, *J* = 10.7 Hz, 6H), 0.87 (t, *J* = 7.3 Hz, 3H). <sup>13</sup>C NMR (100 MHz, CDCl<sub>3</sub>) δ 198.43, 168.62, 114.07, 93.46, 50.78, 42.46, 36.64, 32.15, 31.85, 28.66, 27.87, 20.29, 14.08. HRMS (ESI, m/z): [M+H]<sup>+</sup> calcd. for C<sub>14</sub>H<sub>22</sub>O<sub>3</sub>, 239.1647; found 239.1648.

**2-hydroxy-7,7-dimethyl-4-pentyl-3,4,7,8-tetrahydro-2H-chromen-5(6H)-one (4g)**

Yellow oil; <sup>1</sup>H NMR (400 MHz, CDCl<sub>3</sub>) δ 5.40 (dd, *J* = 9.8, 2.4 Hz, 1H), 2.77 – 2.60 (m, 1H), 2.29 – 2.16 (m, 4H), 2.10 (d, *J* = 13.6 Hz, 1H), 1.63 (ddd, *J* = 13.6, 9.8, 5.6 Hz, 2H), 1.54 – 1.16 (m, 8H), 1.05 (dd, *J* = 9.8, 3.7 Hz, 6H), 0.88 (t, *J* = 6.9 Hz, 3H). <sup>13</sup>C NMR (100 MHz, CDCl<sub>3</sub>) δ 198.09, 168.03, 114.20, 93.39, 50.86, 42.42, 34.30, 32.15, 31.91, 31.78, 28.72, 28.07, 27.86, 26.81, 22.61, 14.07. HRMS (ESI, m/z): [M+H]<sup>+</sup> calcd. for C<sub>16</sub>H<sub>26</sub>O<sub>3</sub>, 267.1960; found 267.1959.

**<sup>1</sup>H-NMR, <sup>13</sup>C-NMR and HRMS spectra of chromenone derivatives**

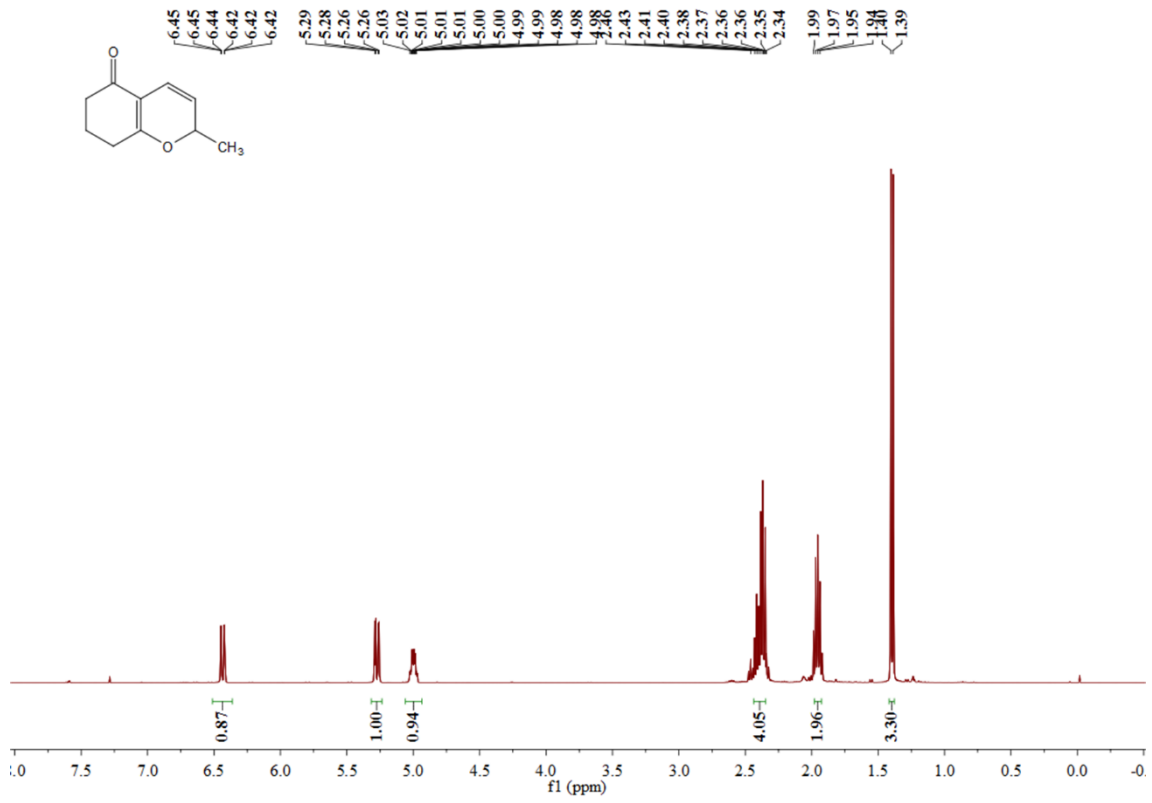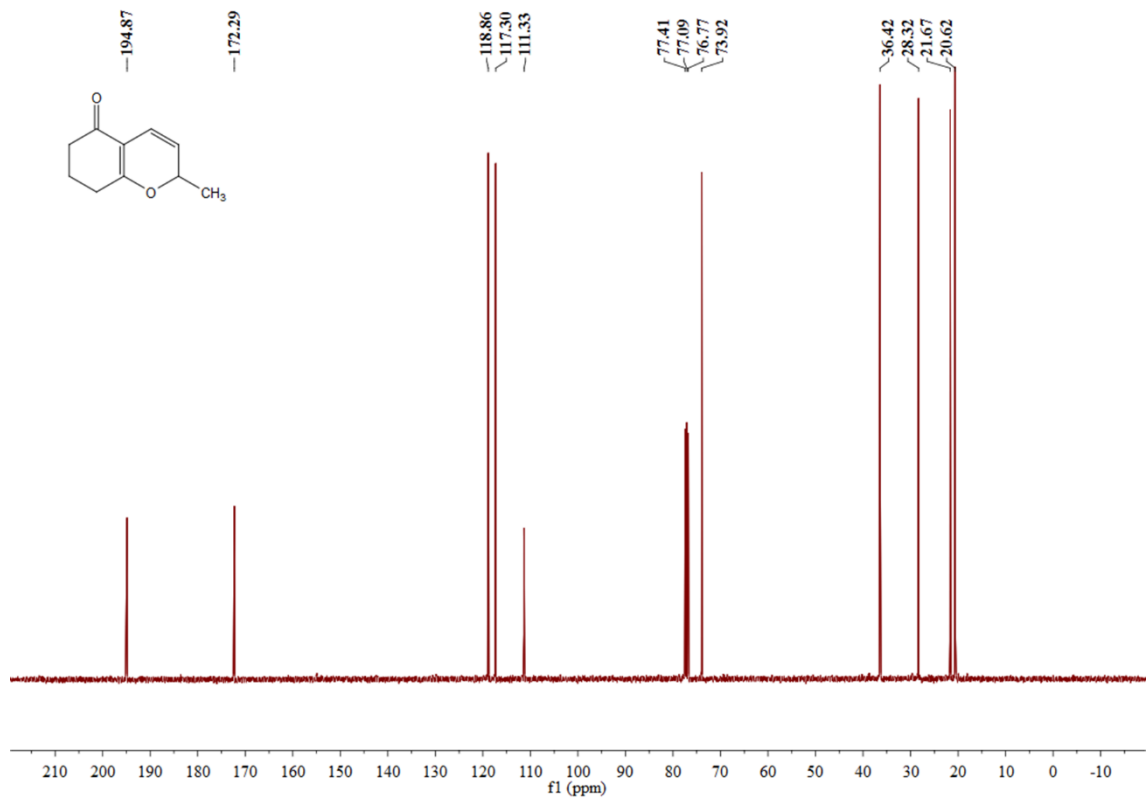



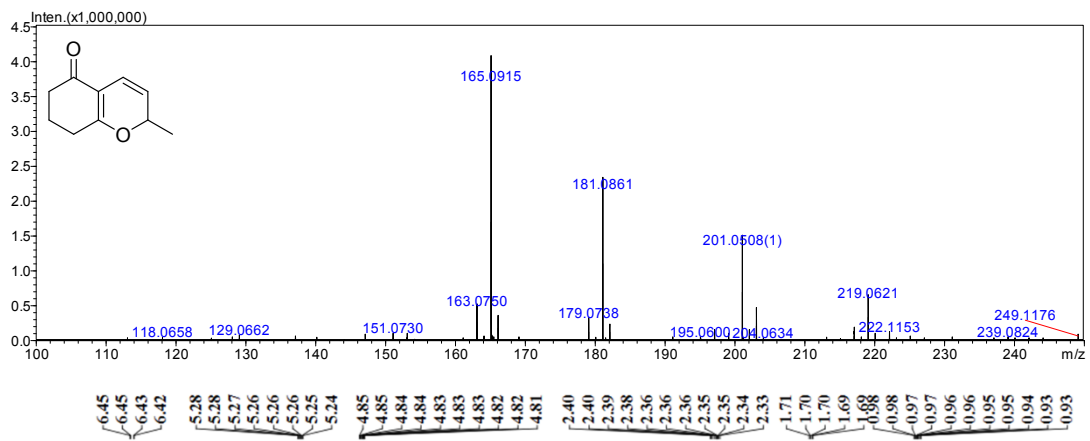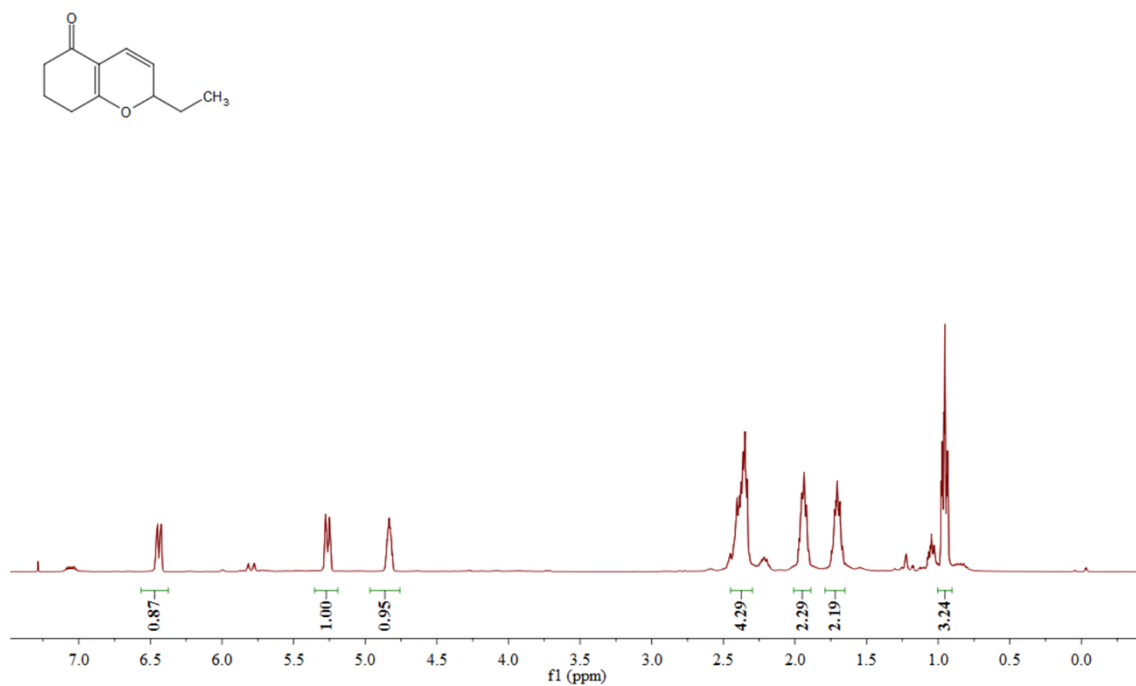

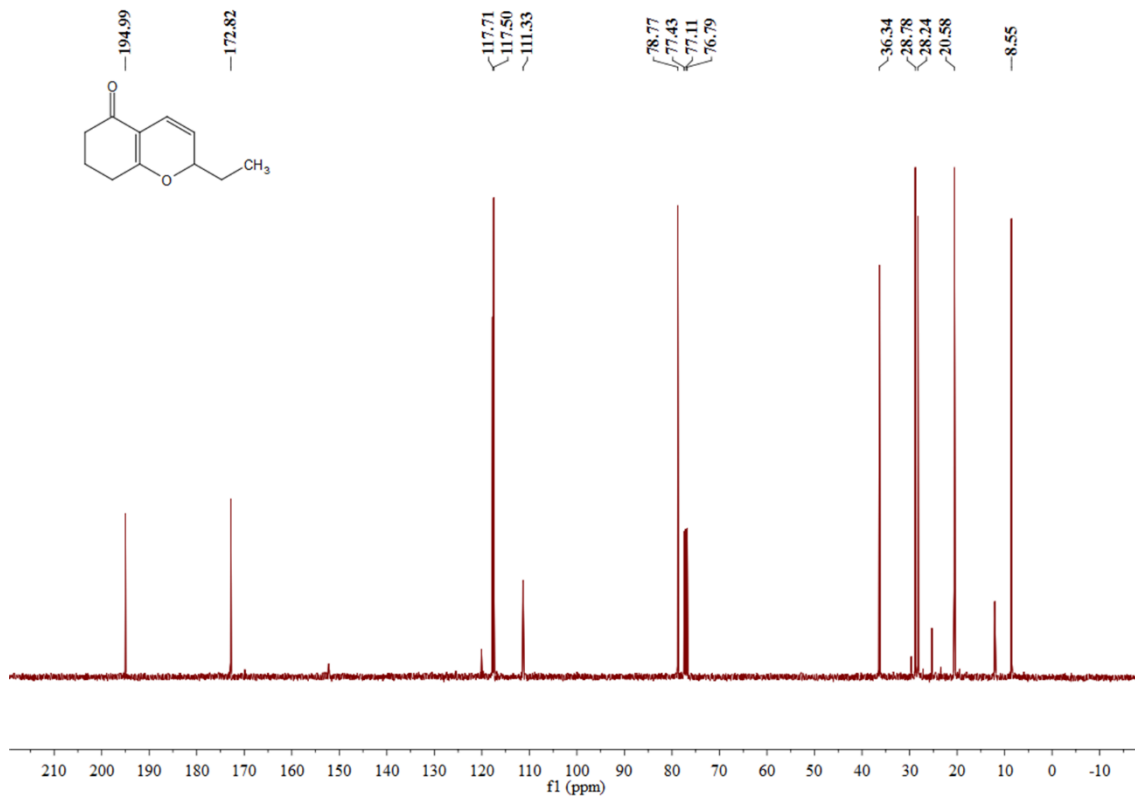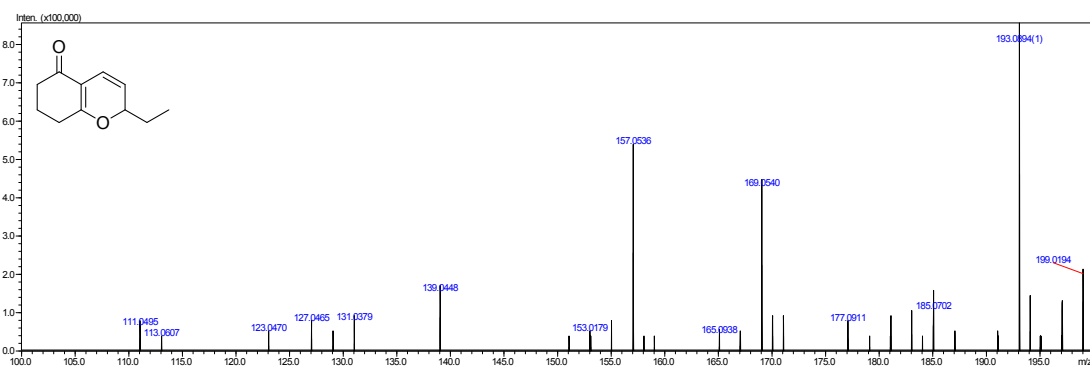

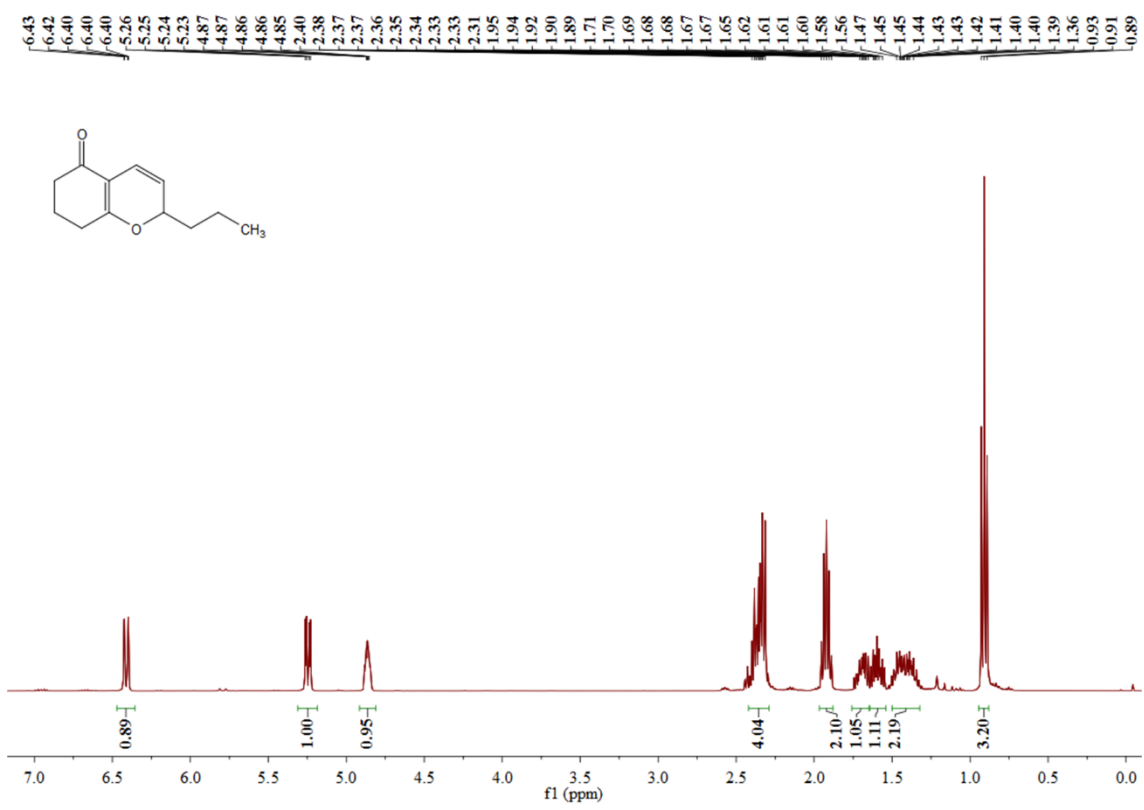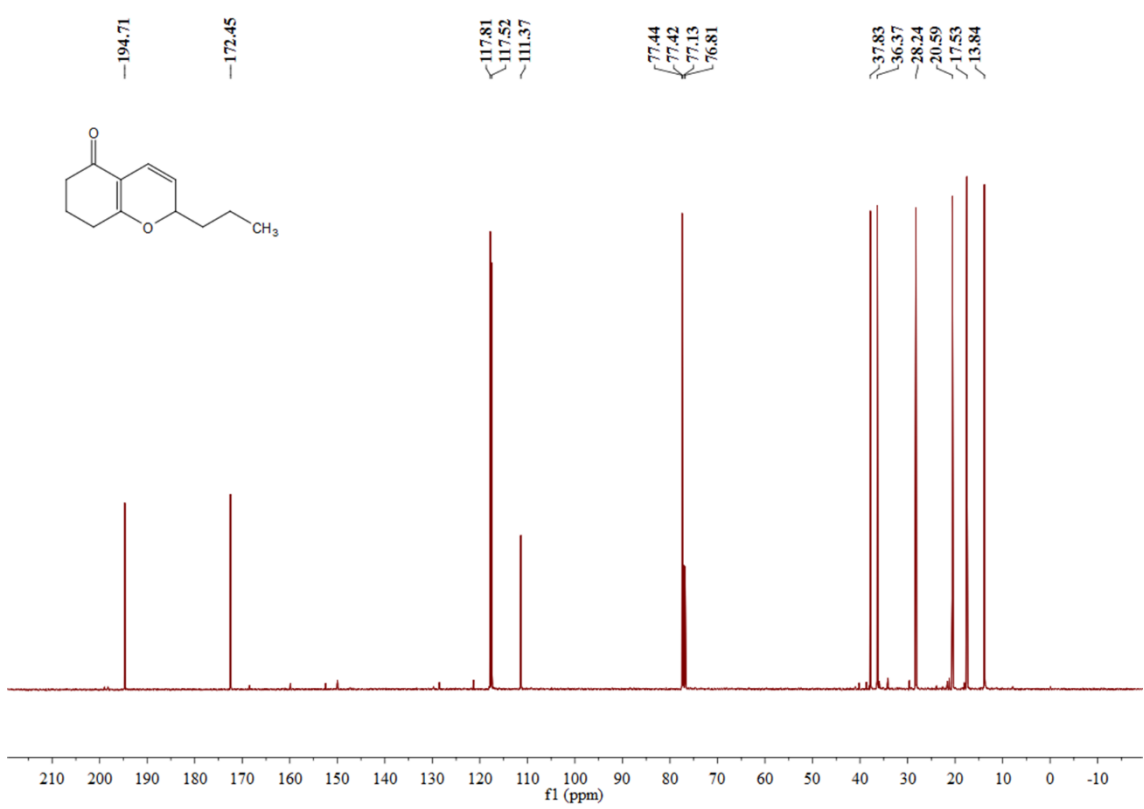

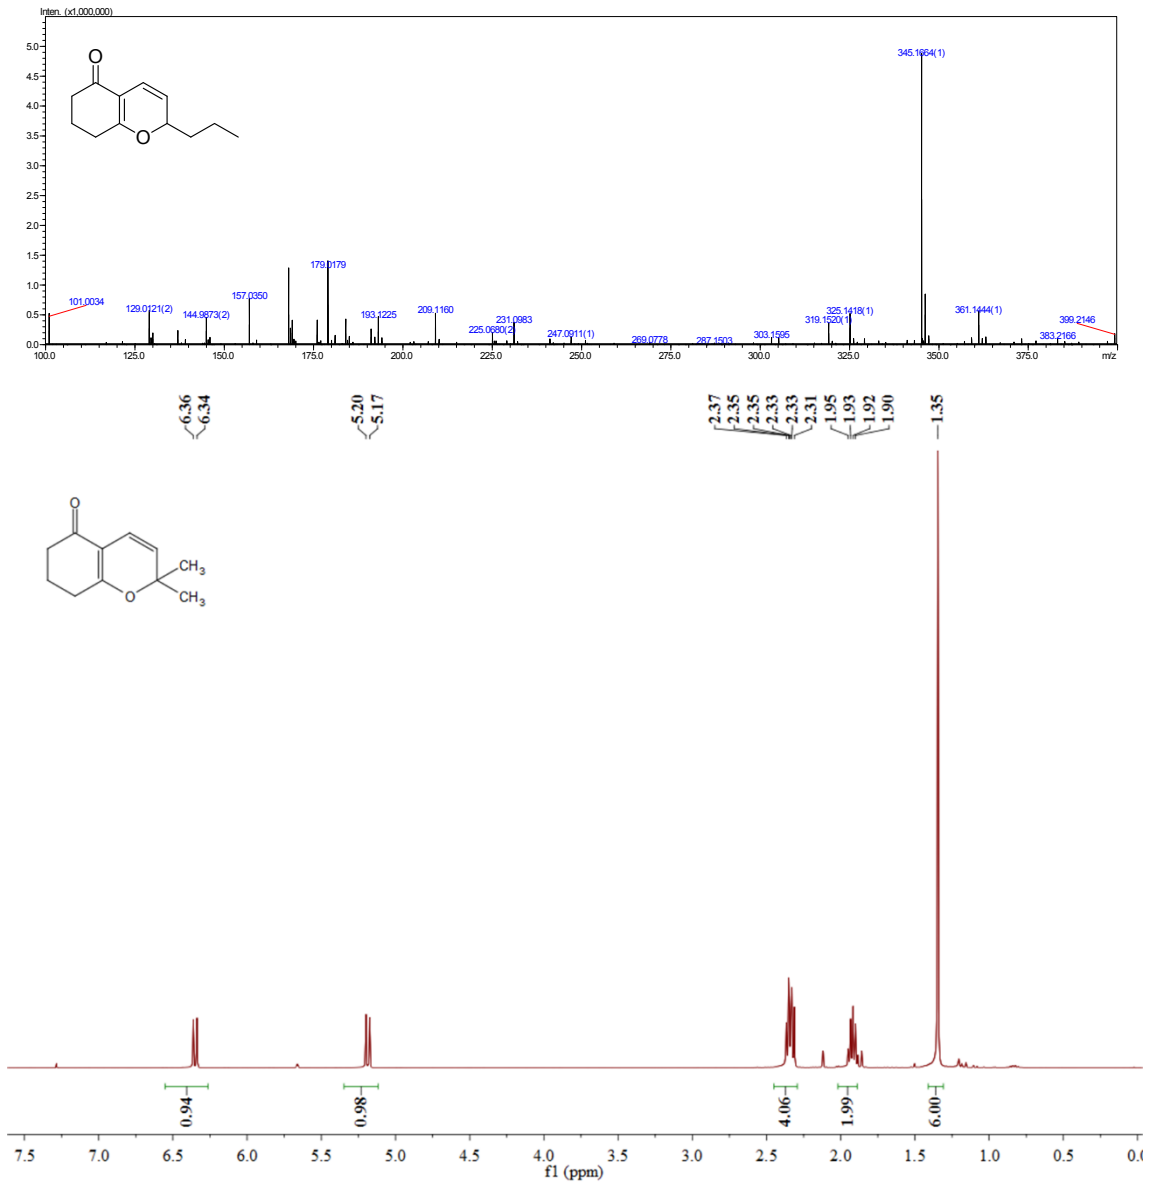

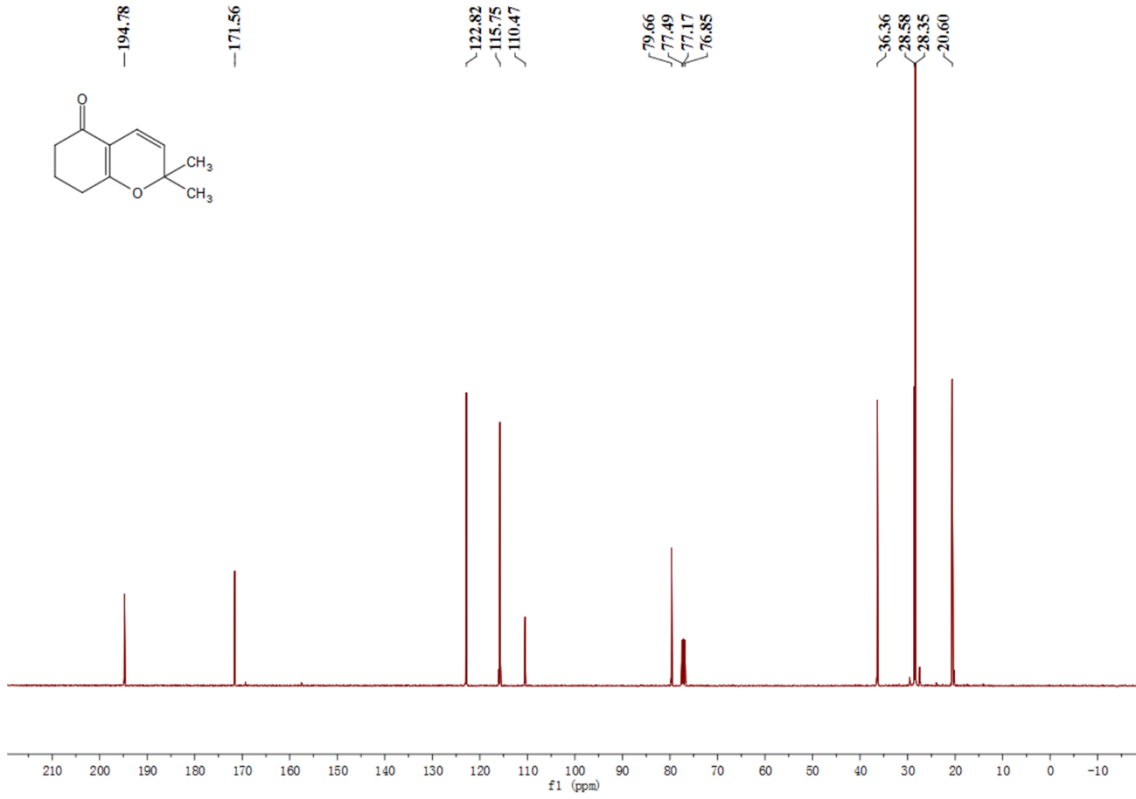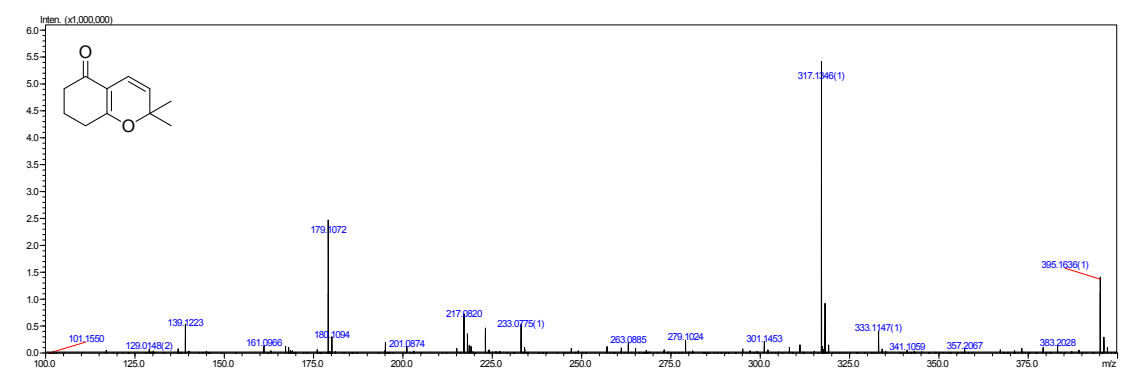

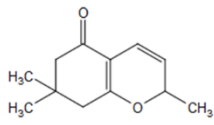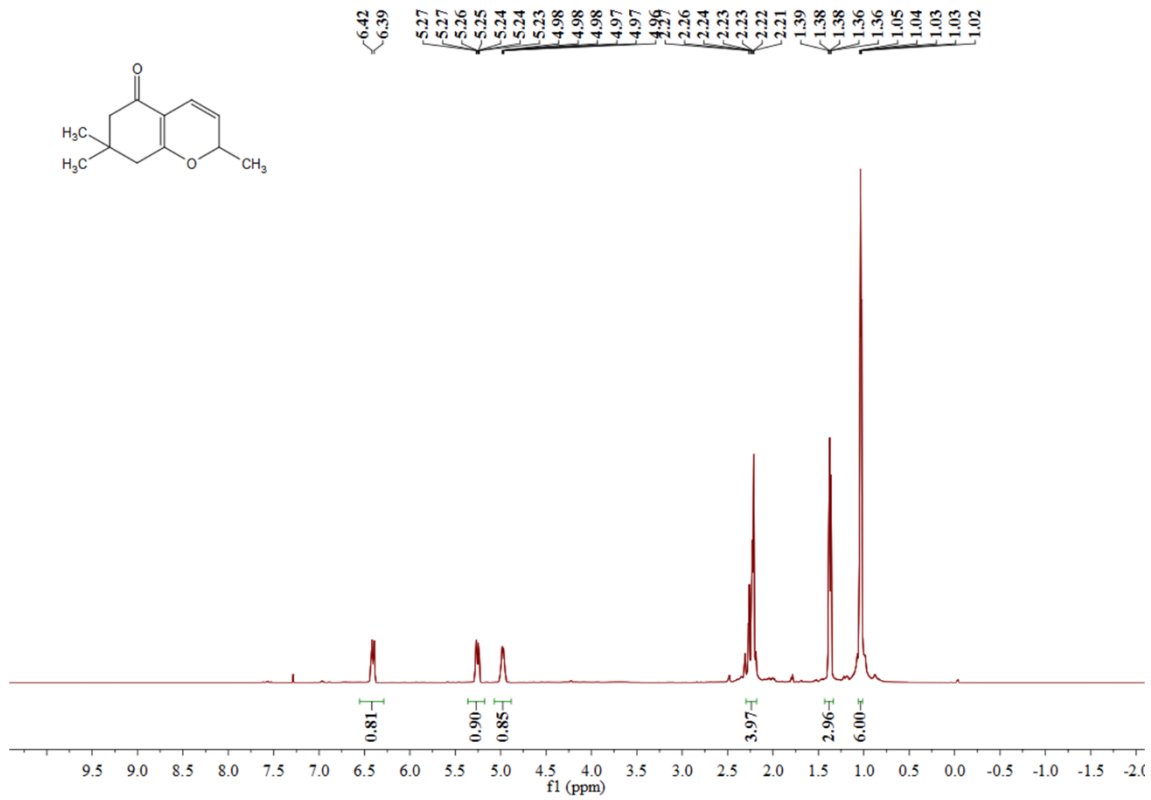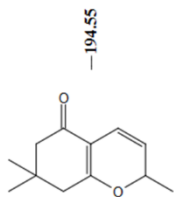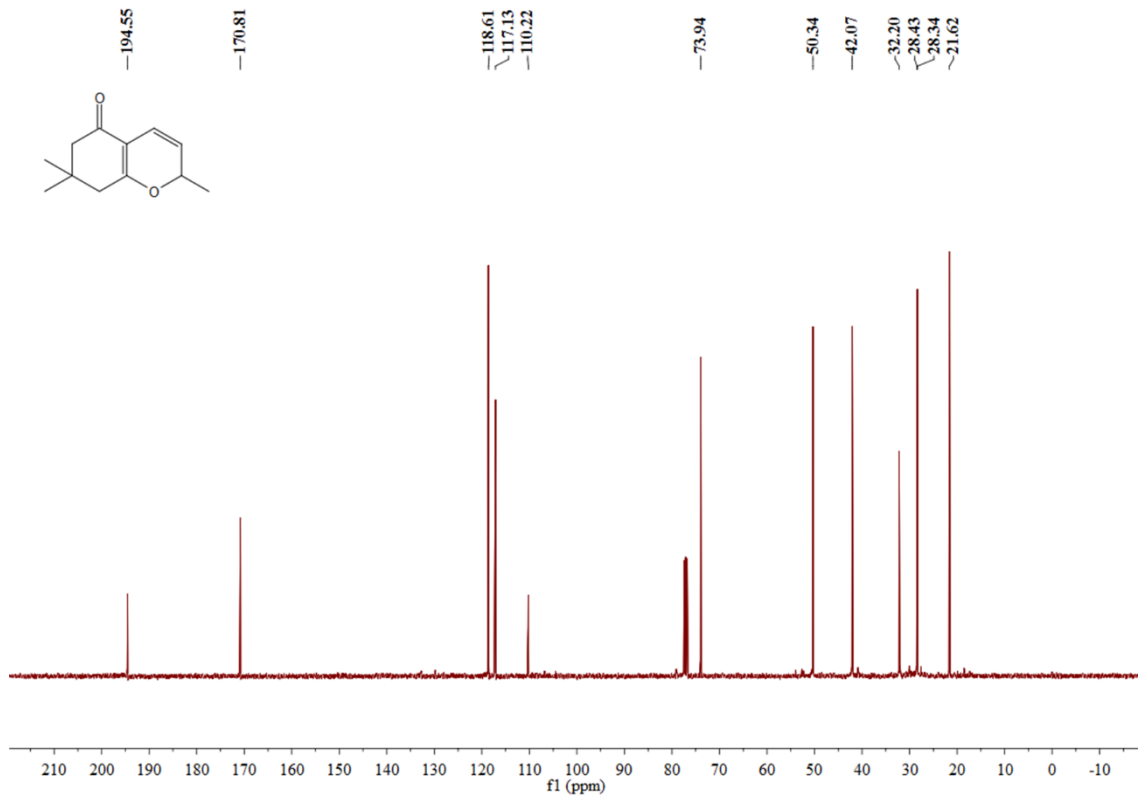

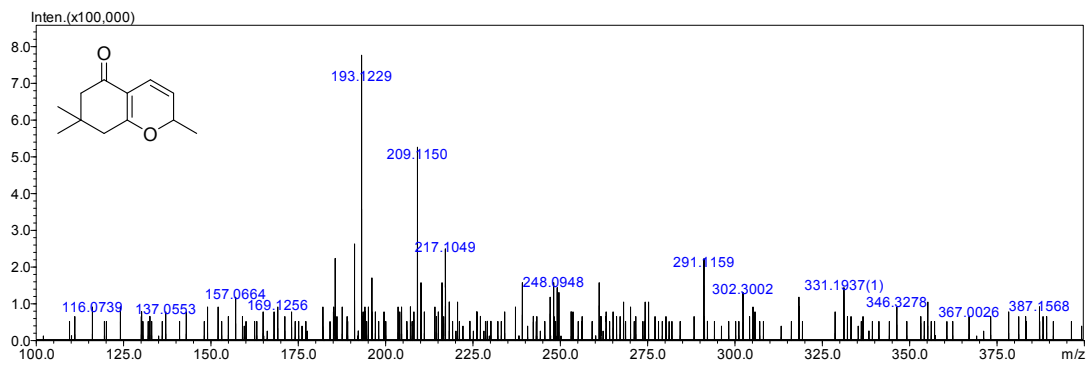

Chemical shift values (ppm) for the corresponding 1H NMR spectrum:

6.44, 6.44, 6.42, 6.42, 5.27, 5.26, 5.24, 5.23, 4.85, 4.85, 4.84, 4.83, 4.83, 4.83, 4.82, 4.82, 4.81, 4.81, 2.32, 2.27, 2.24, 2.21, 2.20, 1.71, 1.69, 1.68, 1.64, 1.03, 0.97, 0.95, 0.93

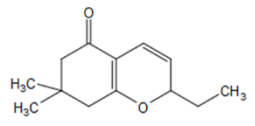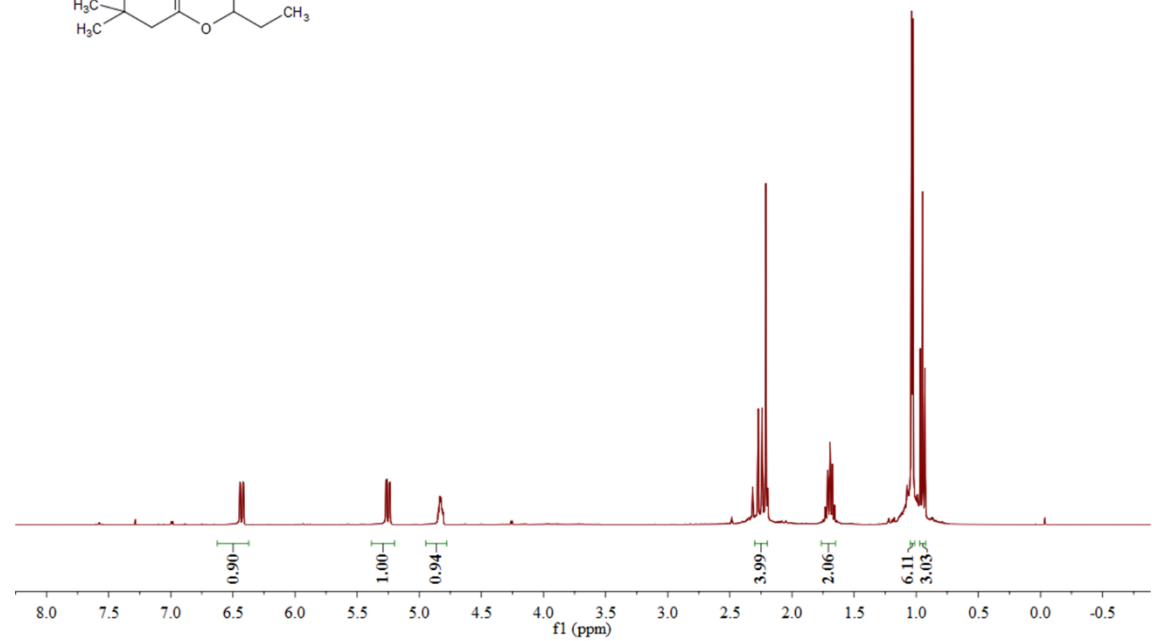

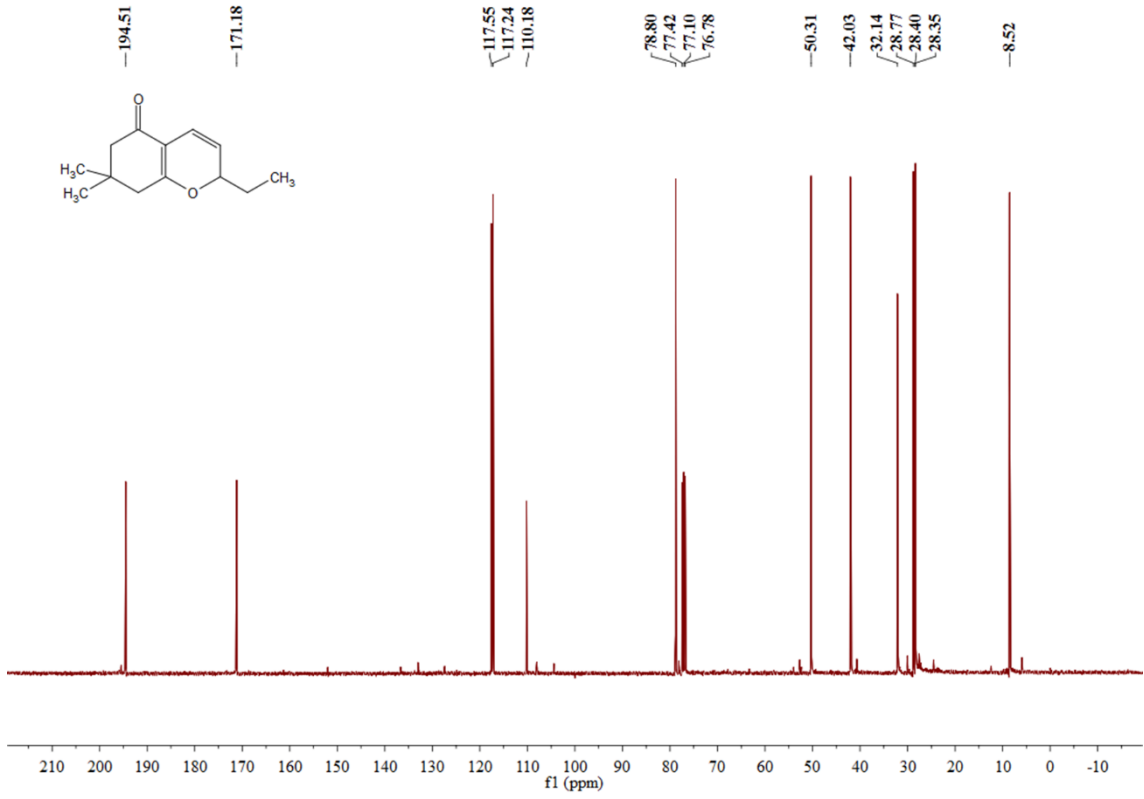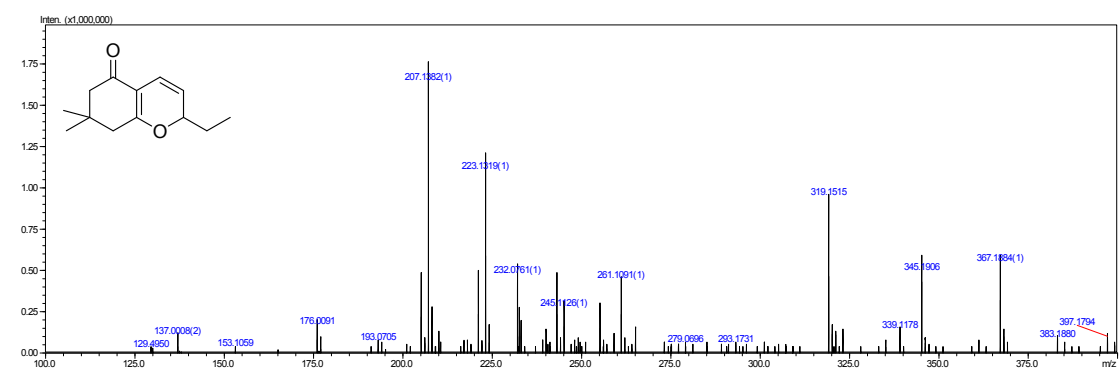



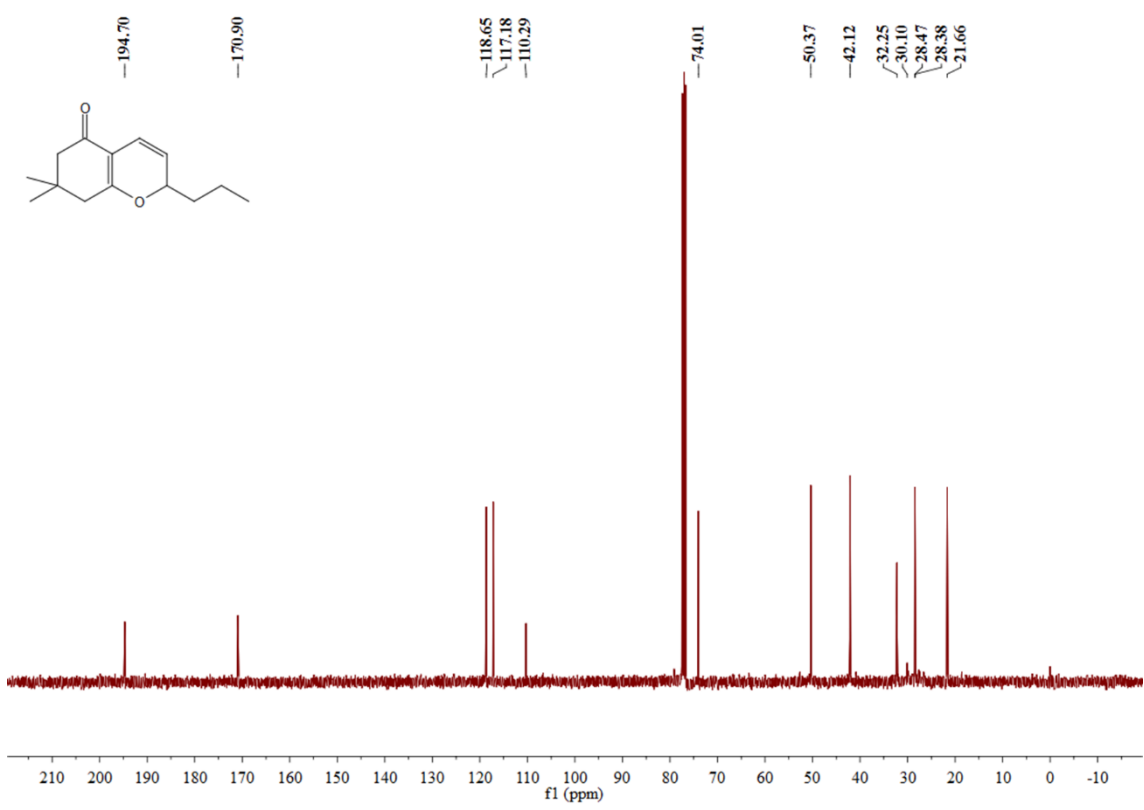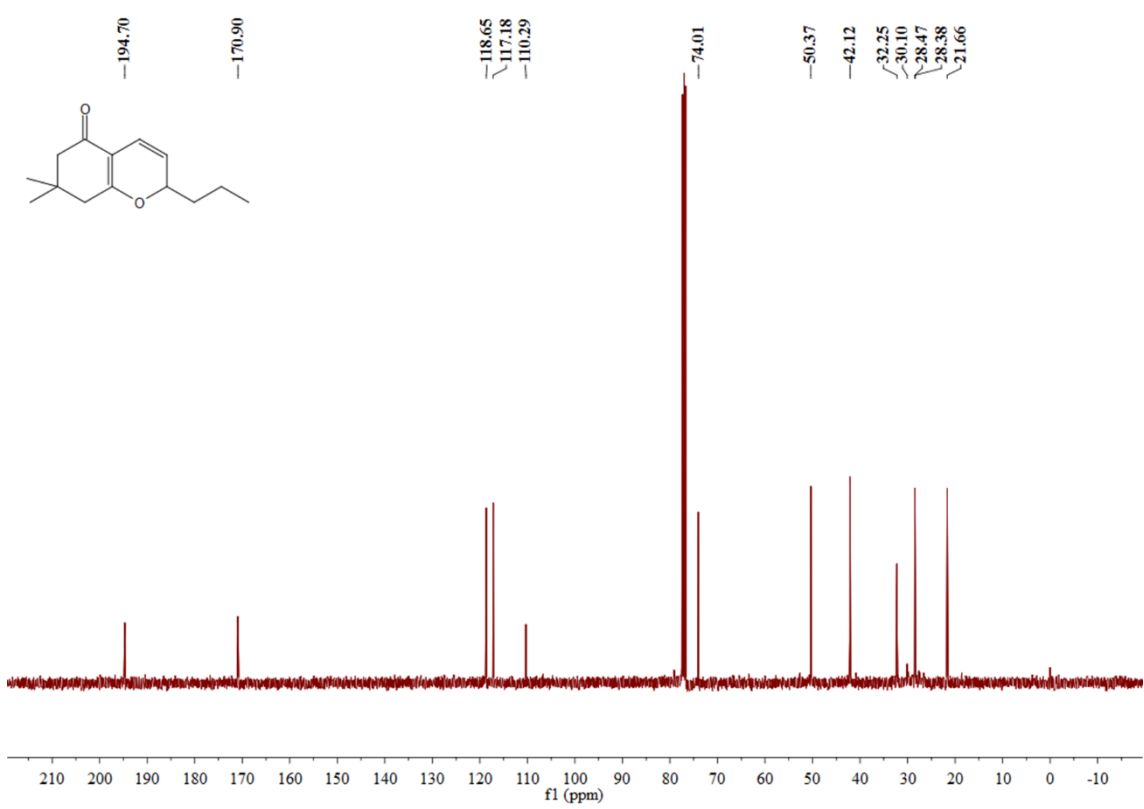

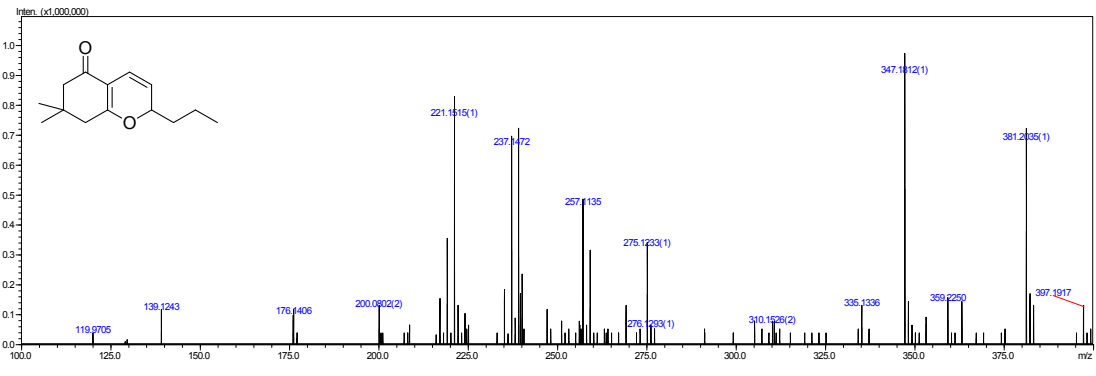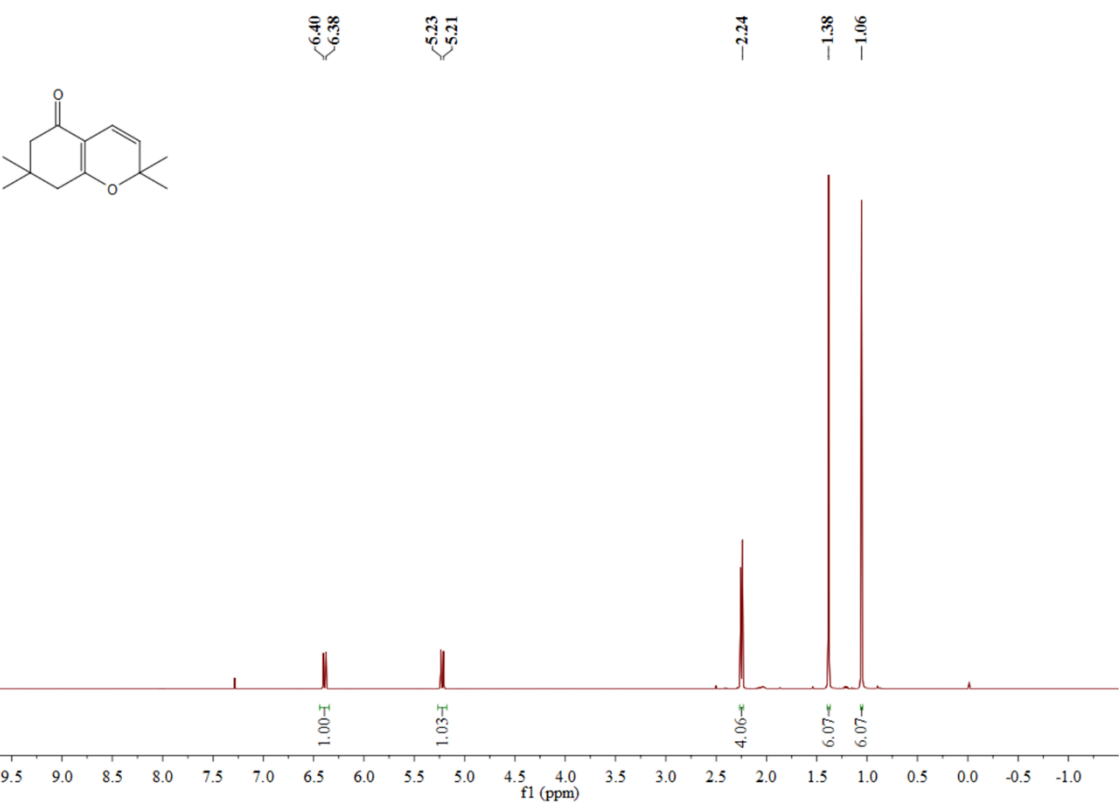

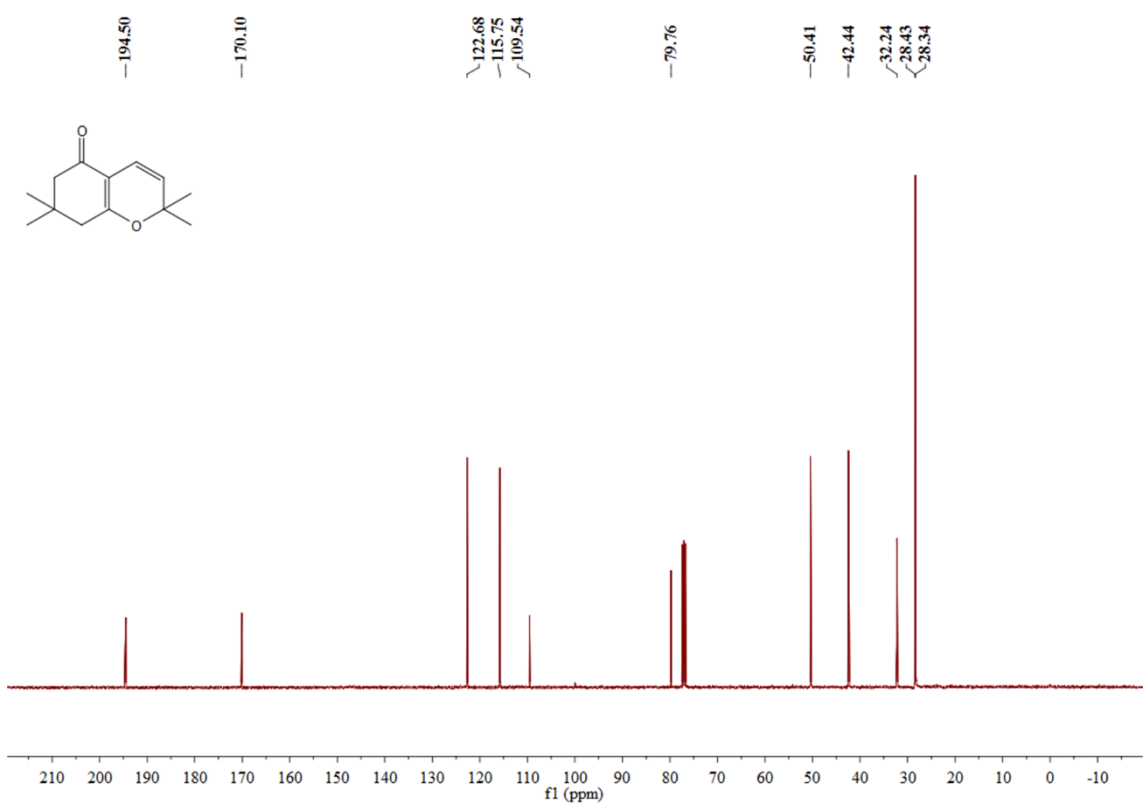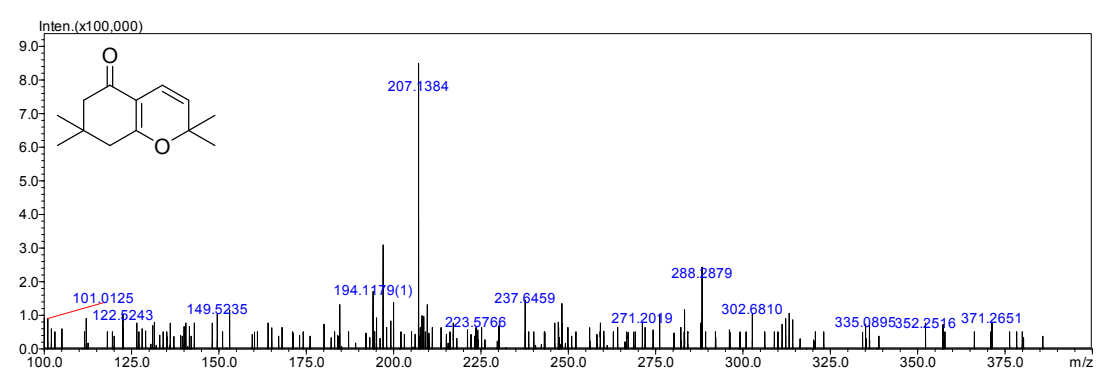

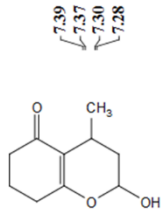

5.33  
5.32  
5.31  
5.31  
5.29  
5.29  
5.28  
5.27  
5.27

2.66  
2.65  
2.64  
2.63  
2.63  
2.52  
2.51  
2.51  
2.50

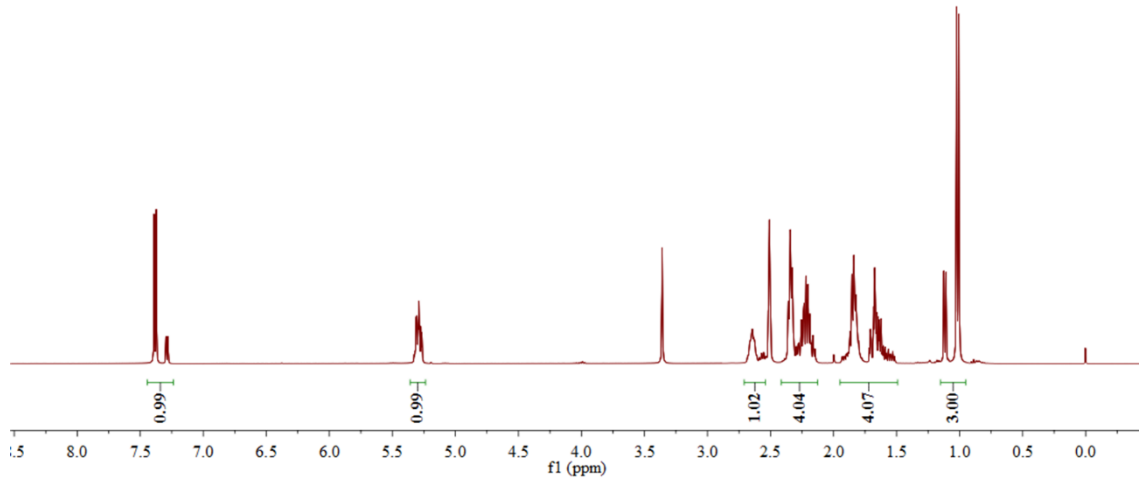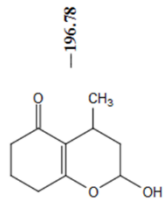

115.28

93.17

40.37  
40.16  
39.95  
39.74  
39.53  
37.13  
35.90  
28.58  
23.40  
21.23  
21.07

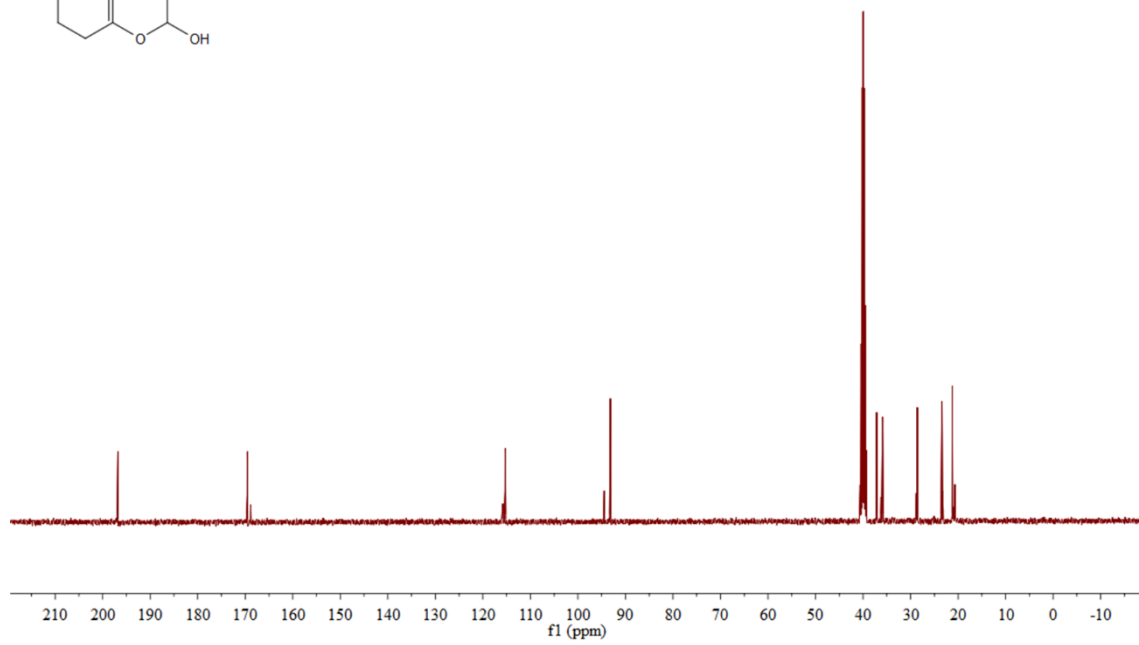

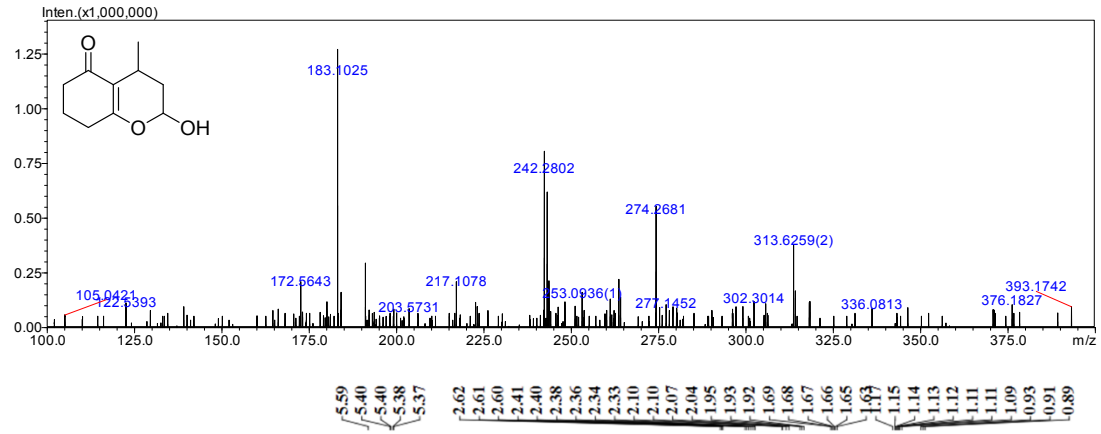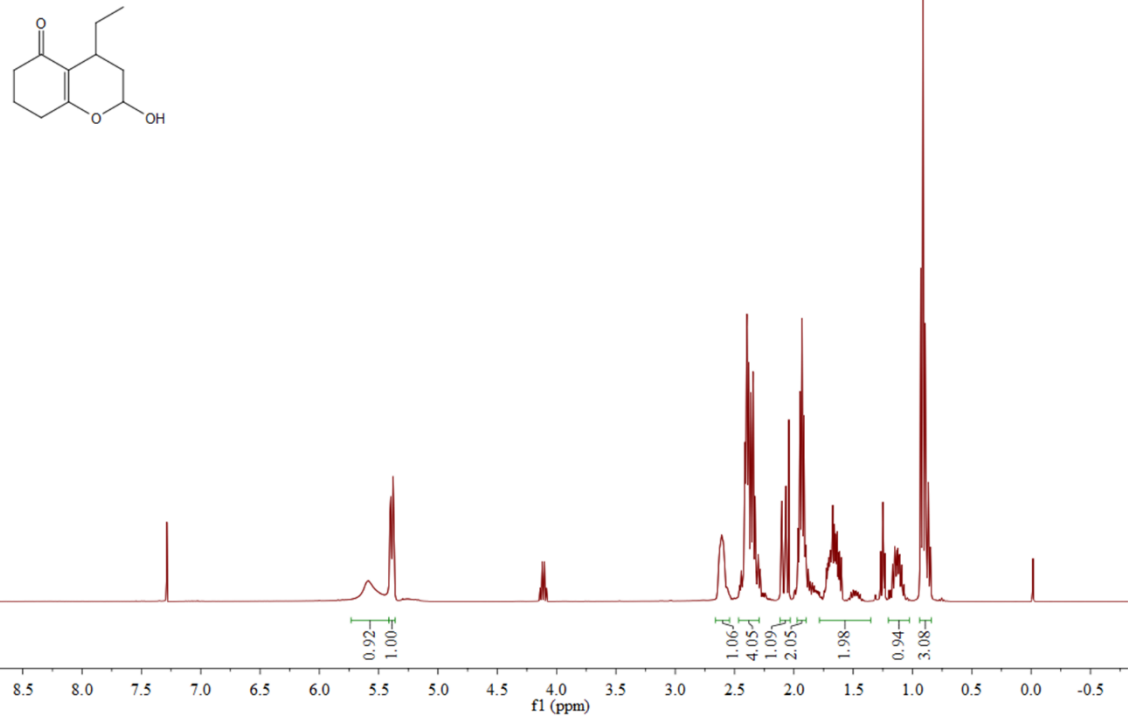

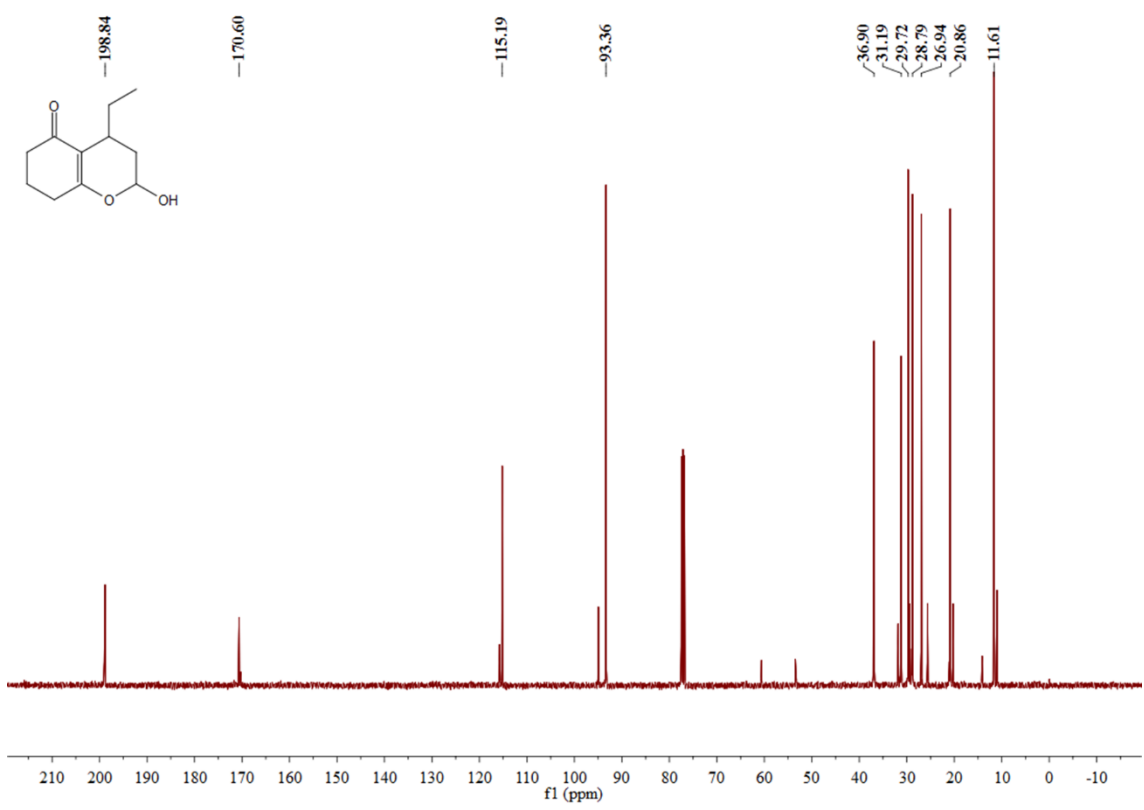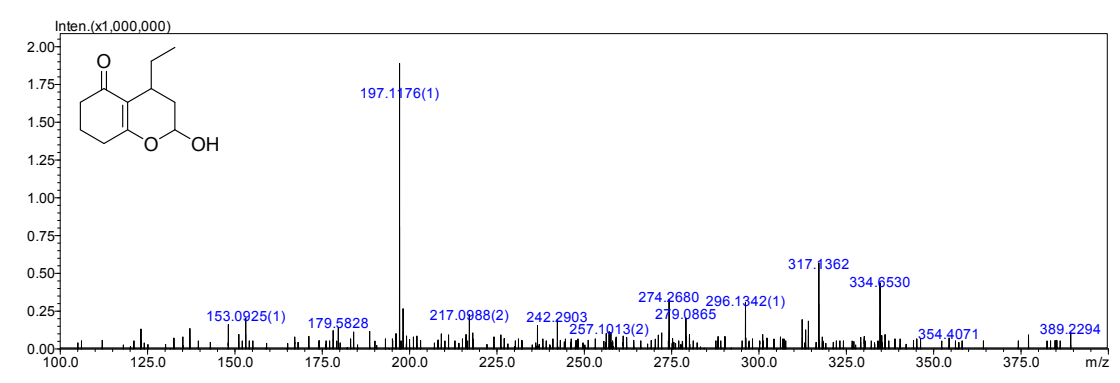

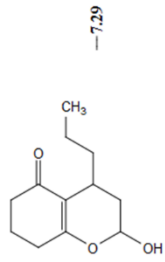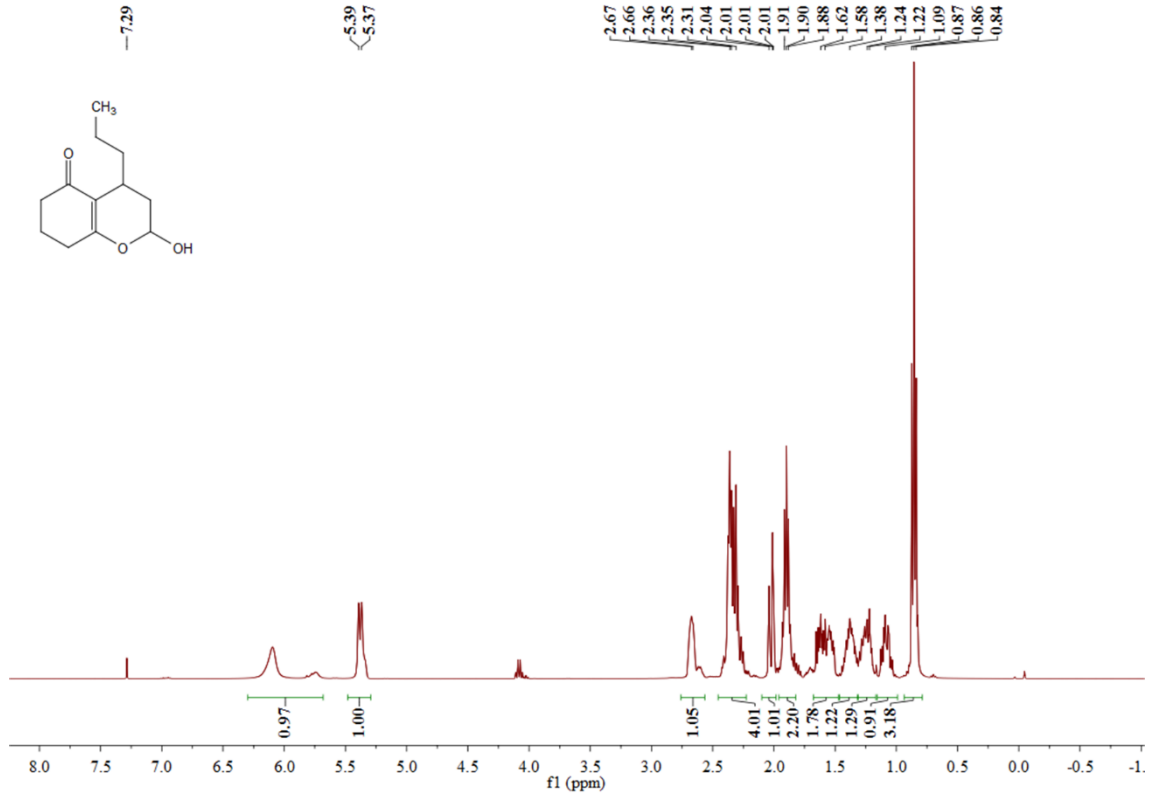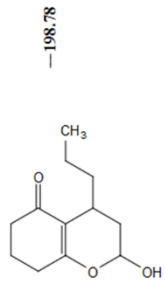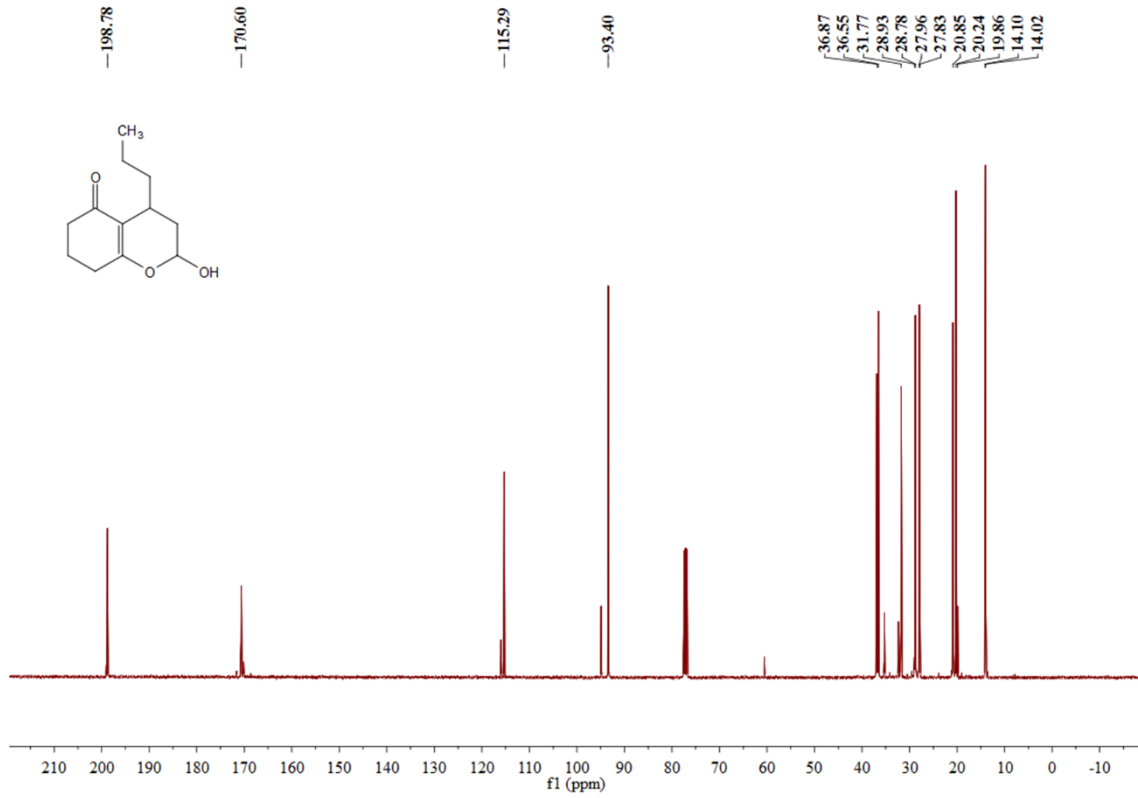

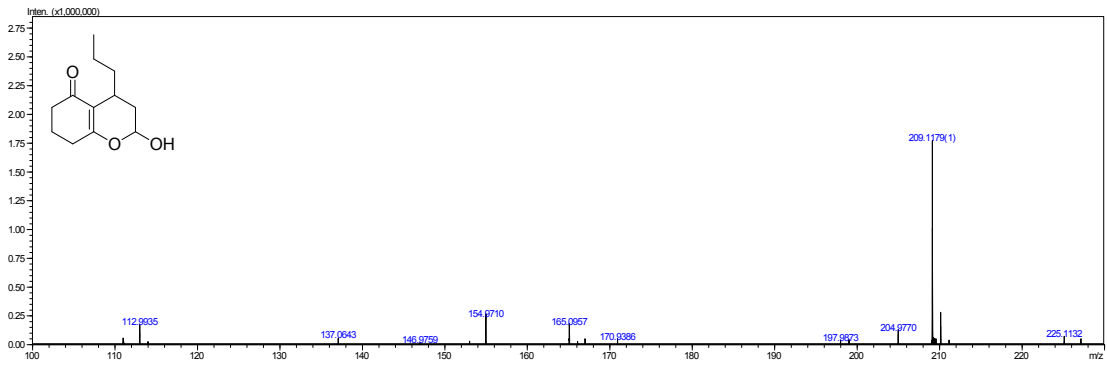

5.43  
5.41

2.26  
2.24  
2.21  
1.89  
1.87  
1.86  
1.85  
1.25  
1.24  
1.22  
1.11  
1.09  
1.05  
1.02

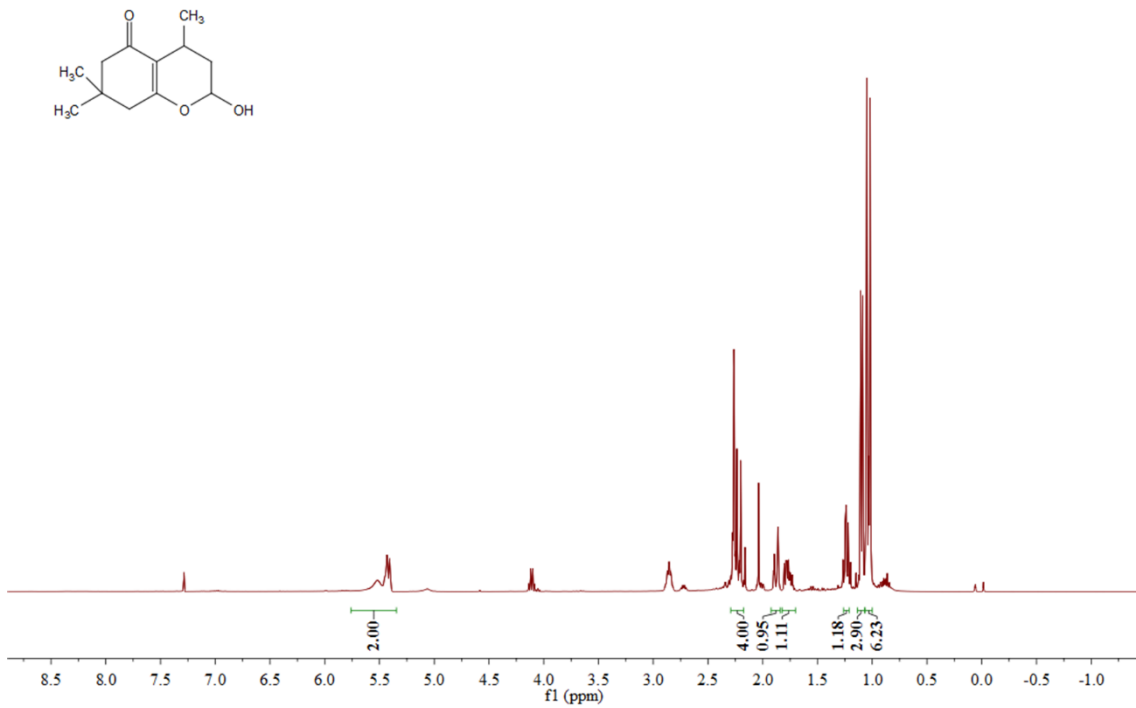



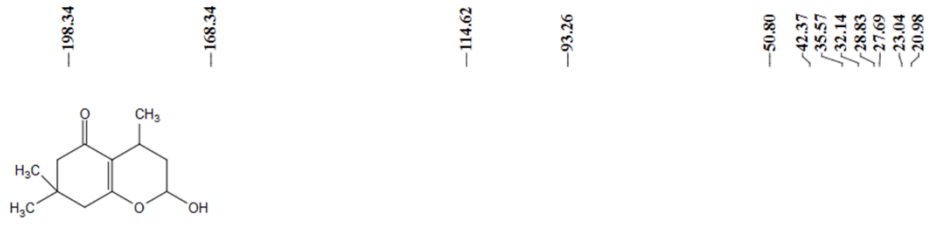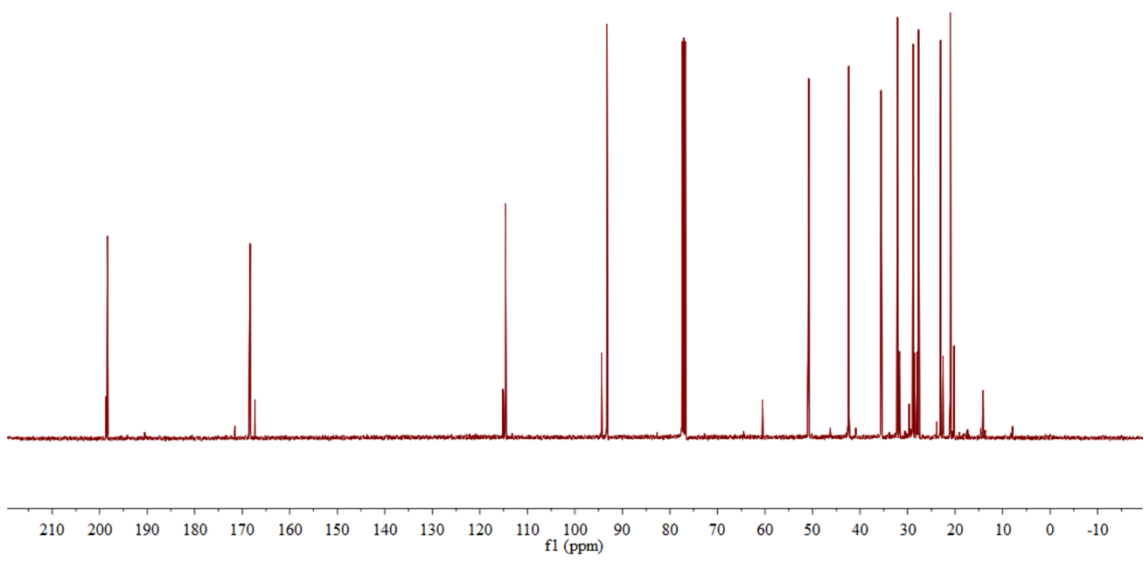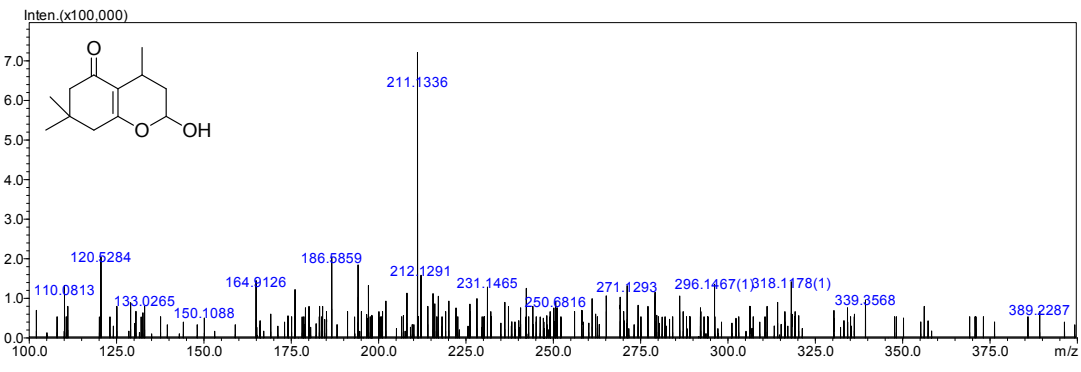

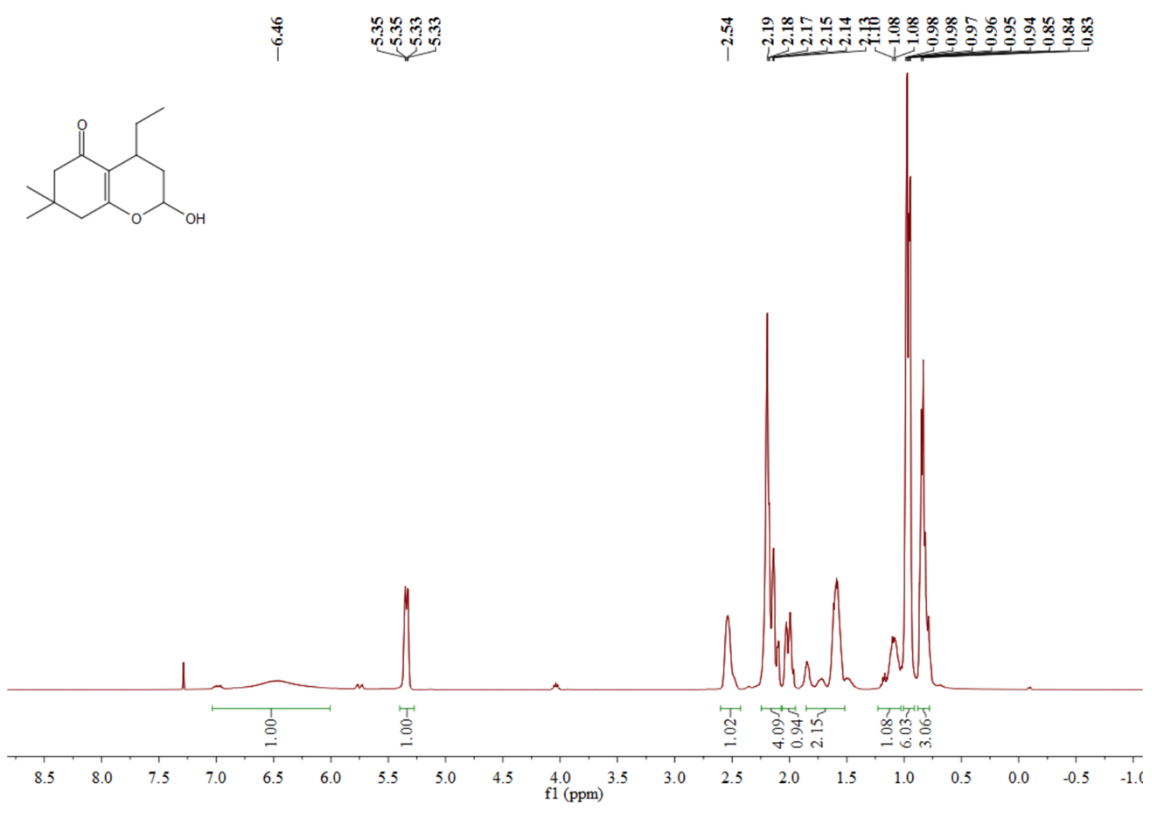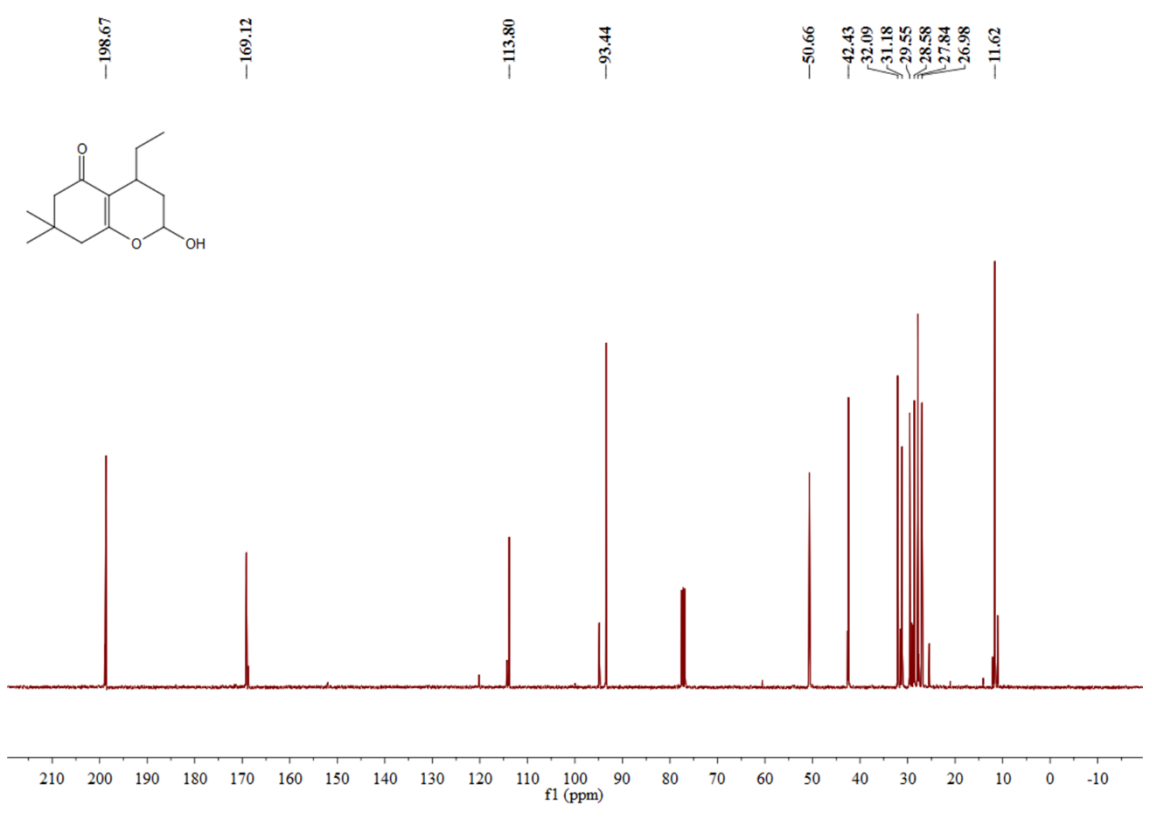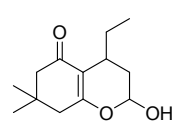

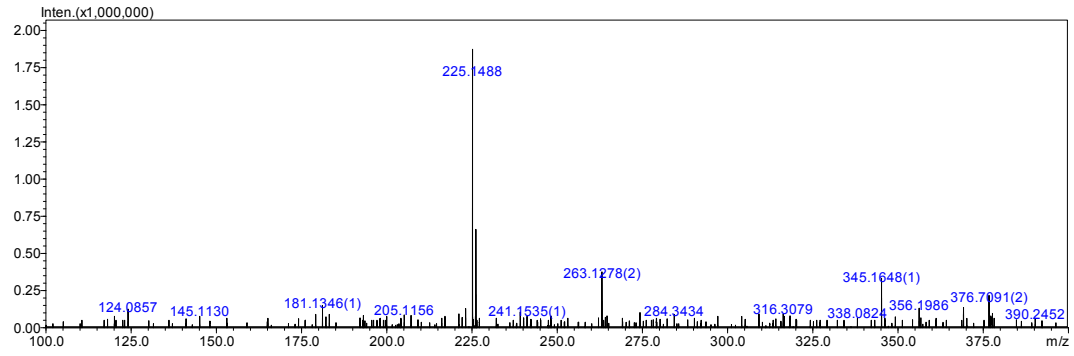

5.41, 5.40, 5.38, 5.38, 2.71, 2.70, 2.68, 2.61, 2.26, 2.25, 2.22, 2.19, 1.65, 1.63, 1.59, 1.40, 1.38, 1.30, 1.28, 1.26, 1.12, 1.09, 1.03, 1.00, 0.89, 0.87, 0.85

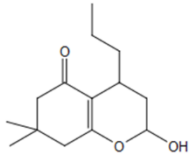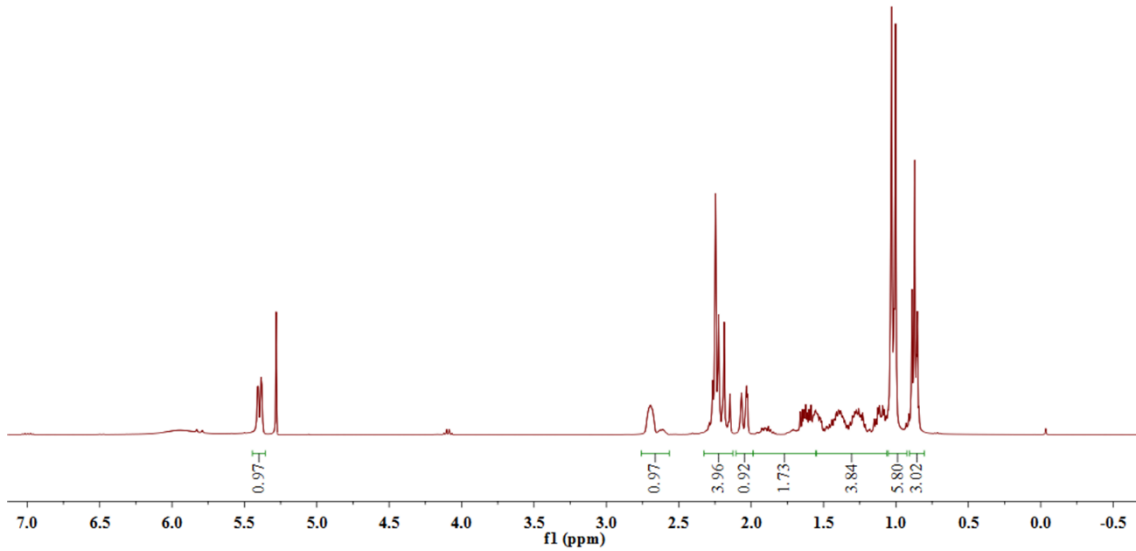

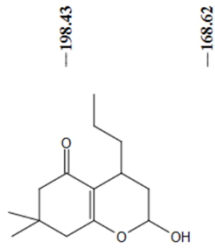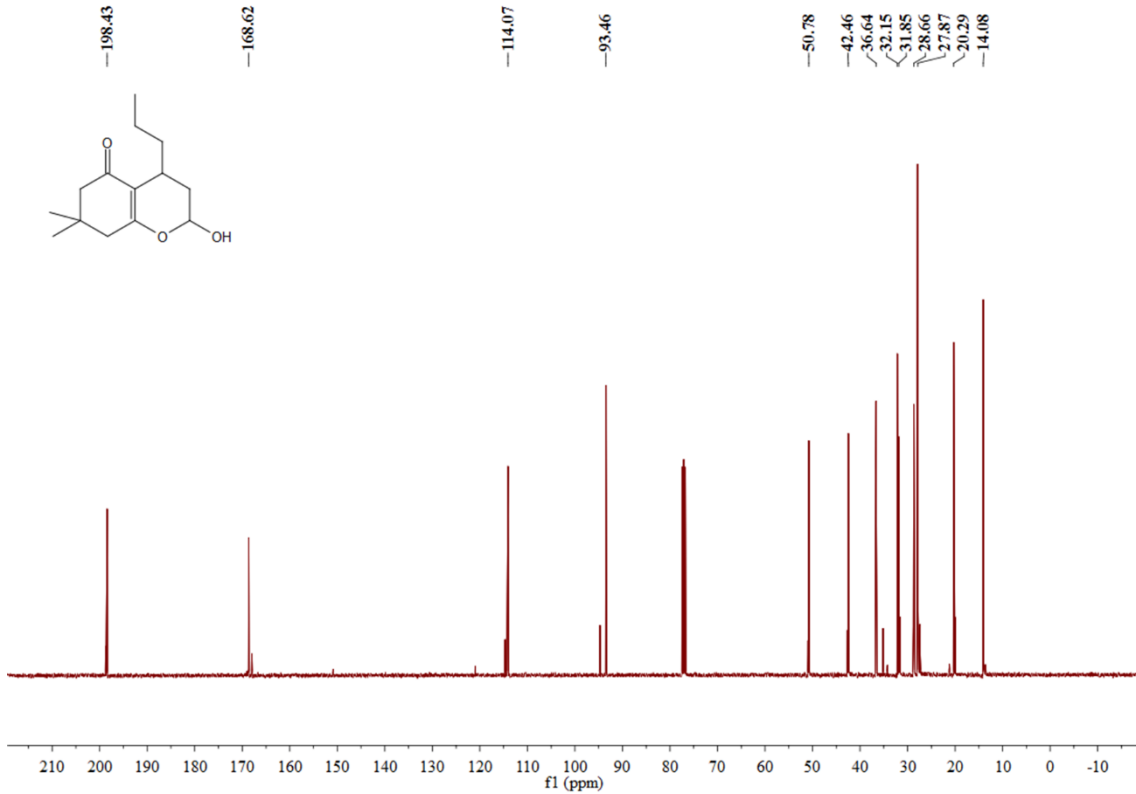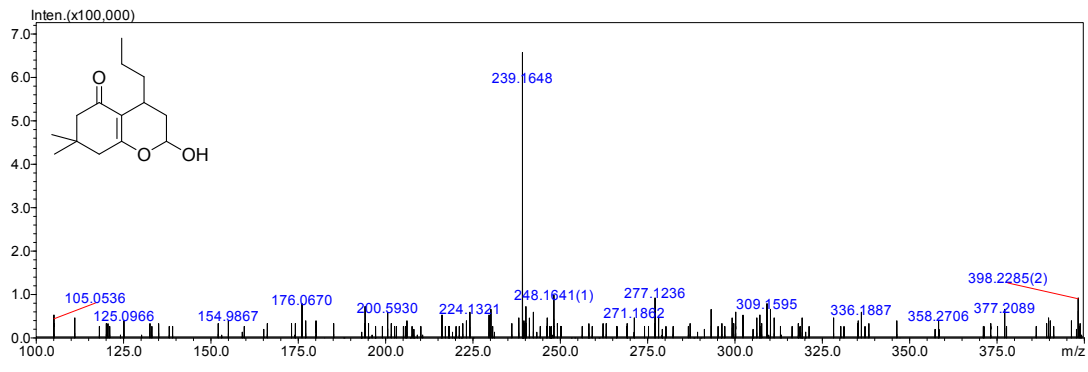

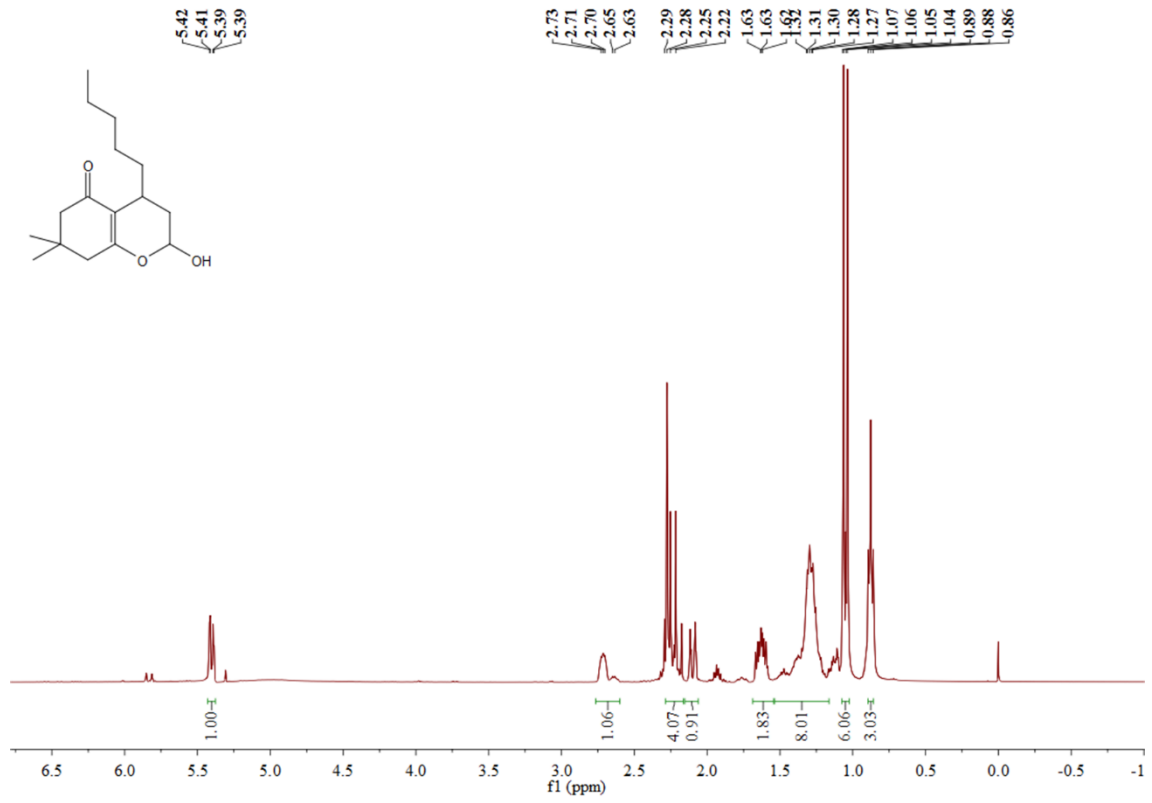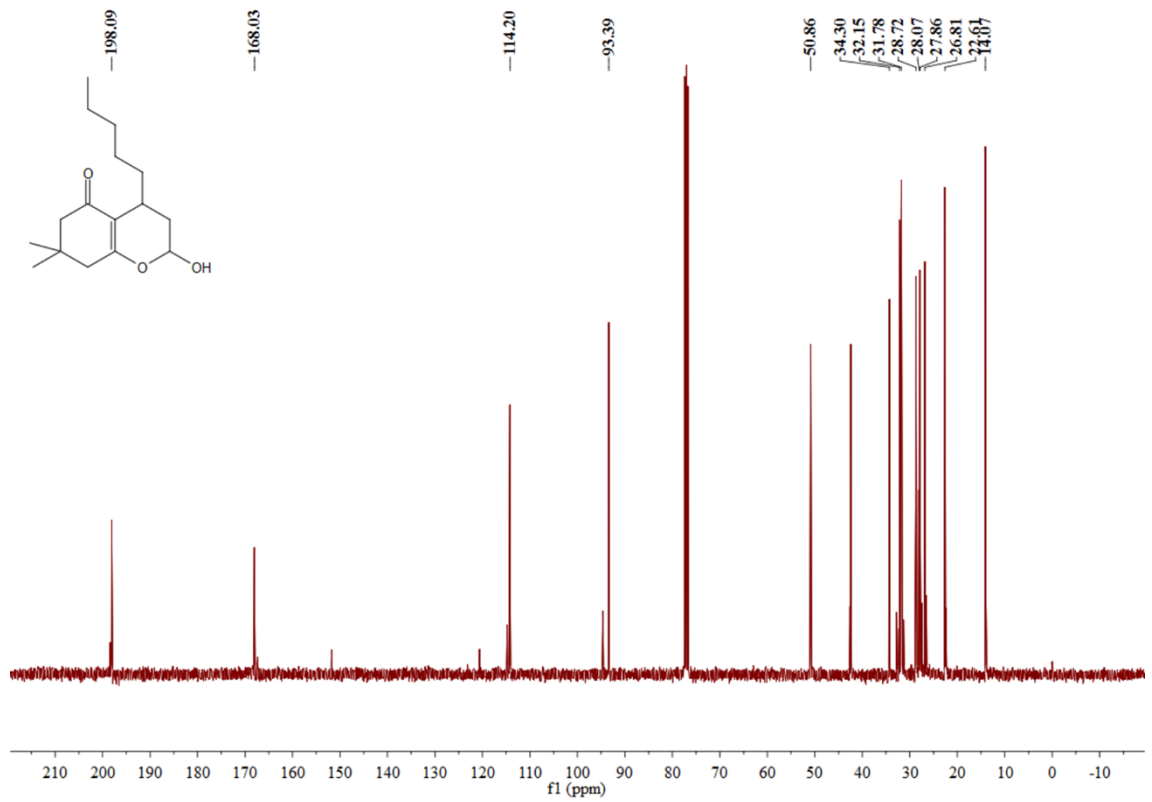

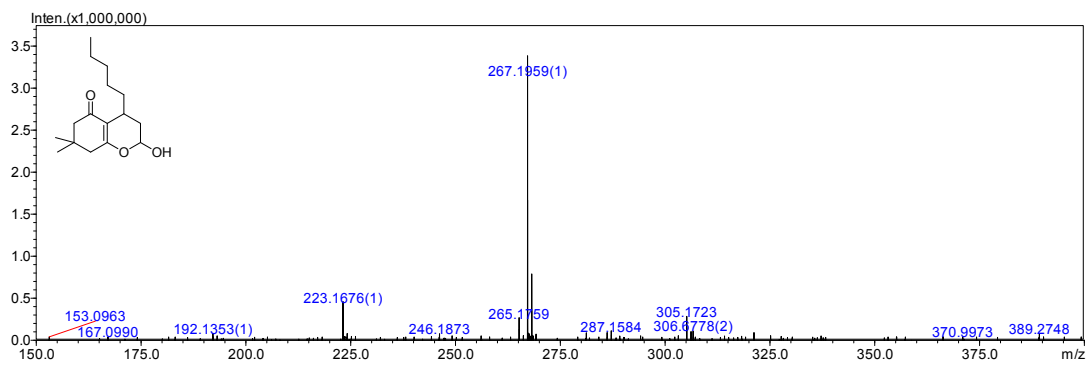

Supplement: c5ra13267c1.pdf [file c5ra13267c1.pdf]
